# Supplementary material for: Multidisciplinary analysis of Italian Alpine wildflower honey reveals criticalities, diversity and value
Source: PubMed Central journal article supplement (PMC8481395; doi:10.1038/s41598-021-98876-y), 2021-09-29

Table S2. Relative frequencies of the main pollen types in honeys.

|                                       | SAMPLE CODE                                                                                                                                                                                                                                                                                                                                                                                                                                                                                                                                                                                                                                                                                                                                                                                                                           |                                                                                                                                                                                                                                                                                                                                                                                                                                                                                                                                                                                                                                                                                                                                 |                                                                                                                                                                                                                                                                                                                                                                                                                                                                                                                                                                                                                                        |                                                                                                                                                                                                                                                                                                                                                                                                    |                                                                                                                                                                                                                                                                                                                                                                                                                                 |                                                                                                                                                                                                                                                                                                                                                                                                                        |
|---------------------------------------|---------------------------------------------------------------------------------------------------------------------------------------------------------------------------------------------------------------------------------------------------------------------------------------------------------------------------------------------------------------------------------------------------------------------------------------------------------------------------------------------------------------------------------------------------------------------------------------------------------------------------------------------------------------------------------------------------------------------------------------------------------------------------------------------------------------------------------------|---------------------------------------------------------------------------------------------------------------------------------------------------------------------------------------------------------------------------------------------------------------------------------------------------------------------------------------------------------------------------------------------------------------------------------------------------------------------------------------------------------------------------------------------------------------------------------------------------------------------------------------------------------------------------------------------------------------------------------|----------------------------------------------------------------------------------------------------------------------------------------------------------------------------------------------------------------------------------------------------------------------------------------------------------------------------------------------------------------------------------------------------------------------------------------------------------------------------------------------------------------------------------------------------------------------------------------------------------------------------------------|----------------------------------------------------------------------------------------------------------------------------------------------------------------------------------------------------------------------------------------------------------------------------------------------------------------------------------------------------------------------------------------------------|---------------------------------------------------------------------------------------------------------------------------------------------------------------------------------------------------------------------------------------------------------------------------------------------------------------------------------------------------------------------------------------------------------------------------------|------------------------------------------------------------------------------------------------------------------------------------------------------------------------------------------------------------------------------------------------------------------------------------------------------------------------------------------------------------------------------------------------------------------------|
|                                       | A                                                                                                                                                                                                                                                                                                                                                                                                                                                                                                                                                                                                                                                                                                                                                                                                                                     | B                                                                                                                                                                                                                                                                                                                                                                                                                                                                                                                                                                                                                                                                                                                               | C                                                                                                                                                                                                                                                                                                                                                                                                                                                                                                                                                                                                                                      | D                                                                                                                                                                                                                                                                                                                                                                                                  | E                                                                                                                                                                                                                                                                                                                                                                                                                               | F                                                                                                                                                                                                                                                                                                                                                                                                                      |
| <b>Dominant pollen (&gt;45%)</b>      | <i>Rhododendron</i> (47.18)                                                                                                                                                                                                                                                                                                                                                                                                                                                                                                                                                                                                                                                                                                                                                                                                           | <i>Rubus</i> (67.12)                                                                                                                                                                                                                                                                                                                                                                                                                                                                                                                                                                                                                                                                                                            | <i>Rhododendron</i> (62.93)                                                                                                                                                                                                                                                                                                                                                                                                                                                                                                                                                                                                            |                                                                                                                                                                                                                                                                                                                                                                                                    |                                                                                                                                                                                                                                                                                                                                                                                                                                 | <i>Castanea</i> (96.4)                                                                                                                                                                                                                                                                                                                                                                                                 |
| <b>Secondary pollen (16–45%)</b>      | <i>Pedicularis</i> (26.47)                                                                                                                                                                                                                                                                                                                                                                                                                                                                                                                                                                                                                                                                                                                                                                                                            | <i>Rhododendron</i> (21.24)                                                                                                                                                                                                                                                                                                                                                                                                                                                                                                                                                                                                                                                                                                     | <i>Rubus</i> (17.24)                                                                                                                                                                                                                                                                                                                                                                                                                                                                                                                                                                                                                   | <i>Rhododendron</i> (34.27)<br><i>Rubus</i> (34.74)                                                                                                                                                                                                                                                                                                                                                | <i>Rhododendron</i> (34.14)<br><i>Rubus</i> (44.25)                                                                                                                                                                                                                                                                                                                                                                             | <i>Ericaceae</i> (32.45)<br><i>Rubus</i> (38.59)                                                                                                                                                                                                                                                                                                                                                                       |
| <b>Important minor pollen (3–15%)</b> | <i>Lotus alpinus</i> (9.17)<br><i>Rubus</i> (11.83)                                                                                                                                                                                                                                                                                                                                                                                                                                                                                                                                                                                                                                                                                                                                                                                   | <i>Cruciferae: Cardamine</i> f. (3.31)                                                                                                                                                                                                                                                                                                                                                                                                                                                                                                                                                                                                                                                                                          | <i>Lotus alpinus</i> (3.72)<br><i>Trifolium repens</i> gr. (8.62)                                                                                                                                                                                                                                                                                                                                                                                                                                                                                                                                                                      | <i>Anthyllis</i> f. (14.23)<br><i>Campanulaceae: Campanula</i> ,<br><i>Phyteuma</i> (5.1)<br><i>Pedicularis</i> (4.17)<br><i>Potentilla/fragaria</i> (3.1)                                                                                                                                                                                                                                         | <i>Lotus alpinus</i> (5.22)<br><i>Trifolium repens</i> gr. (3.48)<br><i>Hippocrepis/Coronilla</i> (3.13)                                                                                                                                                                                                                                                                                                                        | <i>Potentilla/fragaria</i> (3.47)<br><i>Sorbus</i> f. (6.14)<br><i>Tilia</i> (3.5)<br><i>Trifolium repens</i> gr. (4.38)                                                                                                                                                                                                                                                                                               |
| <b>Minor pollen (&lt;3%)</b>          | <i>Clematis</i> (2.21)                                                                                                                                                                                                                                                                                                                                                                                                                                                                                                                                                                                                                                                                                                                                                                                                                | <i>Pedicularis</i> (1.73)<br><i>Sorbus</i> f. (1.75)<br><i>Umbelliferae: Anthriscus</i> f. (1.7)                                                                                                                                                                                                                                                                                                                                                                                                                                                                                                                                                                                                                                | <i>Campanulaceae: Campanula</i> ,<br><i>Phyteuma</i> (1.1)<br><i>Pedicularis</i> (2.1)                                                                                                                                                                                                                                                                                                                                                                                                                                                                                                                                                 | <i>Centaurea</i> (2.00)<br><i>Polygonum bistorta</i> (2.3)                                                                                                                                                                                                                                                                                                                                         | <i>Liliaceae: Lilium, Allium</i> ,<br><i>Maianthemum</i> f. (2.78)<br><i>Onobrychis</i> (2.09)<br><i>Potentilla/fragaria</i> (2.43)                                                                                                                                                                                                                                                                                             | <i>Clematis</i> (1.7)<br><i>Polygonum bistorta</i> (1.75)<br><i>Campanulaceae: Campanula</i> ,<br><i>Phyteuma</i> (1.7)                                                                                                                                                                                                                                                                                                |
| <b>Sporadic pollen (1% or less)</b>   | <i>Acer</i><br><i>Ailanthus</i><br><i>Aster/Solidago</i><br><i>Astragalus</i><br><i>Campanulaceae: Campanula</i> ,<br><i>Phyteuma</i><br><i>Castanea</i><br><i>Centaurea</i><br><i>Chamaerops</i><br><i>Chenopodium/Amaranthus</i><br><i>Compositae S: Carduus</i> ,<br><i>Cirsium</i> f.<br><i>Dryas</i> f.<br><i>Filipendula</i><br><i>Gleditsia</i><br><i>Graminaceae</i><br><i>Hypericum</i> f.<br><i>Juniperus</i><br><i>Linaria</i><br><i>Luzula</i><br>honeydew<br><i>Pinaceae</i><br><i>Potentilla/fragaria</i><br><i>Prunus</i><br><i>Quercus</i> r.<br><i>Ranunculaceae: Anemone</i> ,<br><i>Ranunculus</i> f.<br><i>Rosa</i> f.<br><i>Salix</i><br><i>Saxifraga</i><br><i>Sedum/Sempervivum</i><br><i>Stachys</i> f.<br><i>Thalictrum</i><br><i>Thymus</i><br><i>Trifolium pratense</i> gr.<br><i>Trifolium repens</i> gr. | <i>Astrantia</i> f.<br><i>Campanulaceae: Campanula</i> ,<br><i>Phyteuma</i><br><i>Castanea</i><br><i>Compositae S:</i><br><i>Carduus, Cirsium</i> f.<br><i>Epilobium</i><br><i>Filipendula</i><br><i>Graminaceae</i><br><i>Helianthemum</i><br><i>Juniperus</i><br><i>Knautia/Scabiosa</i><br><i>Liliaceae: Lilium, Allium</i> ,<br><i>Maianthemum</i> f.<br><i>Lonicera</i><br><i>Lotus alpinus</i><br><i>Luzula</i><br>honeydew<br><i>Myosotis</i><br><i>Plantago</i><br><i>Polygonum bistorta</i><br><i>Potentilla/fragaria</i><br><i>Rhinanthus</i> f.<br><i>Rosa</i> f.<br><i>Rumex</i><br><i>Salix</i><br><i>Sambucus</i><br><i>Sedum/Sempervivum</i><br><i>Thalictrum</i><br><i>Trifolium repens</i> gr.<br><i>Vicia</i> | <i>Achillea</i><br><i>Buddleja</i><br><i>Castanea</i><br><i>Centaurea</i><br><i>Compositae S: Carduus, Cirsium</i> f.<br><i>Compositae T: Taraxacum, Crepis</i> ,<br><i>Hieracium</i> f.<br><i>Graminaceae</i><br><i>Helianthemum</i><br><i>Hippocrepis/Coronilla</i><br><i>Juniperus</i><br><i>Knautia/Scabiosa</i><br><i>Liliaceae: Lilium, Allium</i> ,<br><i>Maianthemum</i> f.<br><i>Luzula</i><br>honeydew<br><i>Plantago</i><br><i>Polygonum bistorta</i><br><i>Potentilla/fragaria</i><br><i>Prunella</i> f.<br><i>Rumex</i><br><i>Saxifraga</i><br><i>Sedum/Sempervivum</i><br><i>Thymus</i><br><i>Trifolium pratense</i> gr. | <i>Acer</i><br><i>Actinidia</i><br><i>Aruncus</i><br><i>Carex</i><br><i>Castanea</i><br><i>Corylaceae</i><br><i>Fraxinus</i><br><i>Graminaceae</i><br><i>Helianthemum</i><br><i>Juniperus</i><br><i>Lotus alpinus</i><br><i>Luzula</i><br>honeydew<br><i>Quercus</i> r.<br><i>Robinia</i><br><i>Salix</i><br><i>Saxifraga</i><br><i>Sedum/Sempervivum</i><br><i>Sorbus</i> f.<br><i>Thalictrum</i> | <i>Allium</i> f.<br><i>Alnus</i><br><i>Anthyllis</i> f.<br><i>Castanea</i><br><i>Clematis</i><br><i>Graminaceae</i><br><i>Helianthemum</i><br><i>Juniperus</i><br><i>Lonicera</i><br>honeydew<br><i>Papaver</i><br><i>Pinaceae</i><br><i>Plantago</i><br><i>Robinia</i><br><i>Salix</i><br><i>Salvia</i> f.<br><i>Sambucus</i><br><i>Sedum/Sempervivum</i><br><i>Thalictrum</i><br><i>Umbelliferae:</i><br><i>Anthriscus</i> f. | <i>Acer</i><br><i>Actinidia</i><br><i>Aruncus</i><br><i>Centaurea</i><br><i>Crocus</i><br><i>Fraxinus</i><br><i>Graminaceae</i><br><i>Helianthemum</i><br><i>Juniperus</i><br><i>Ligustrum</i> f.<br><i>Lonicera</i><br><i>Luzula</i><br>honeydew<br><i>Papaver</i><br><i>Parthenocissus</i><br><i>Plantago</i><br><i>Prunus</i><br><i>Quercus</i> r.<br><i>Saxifraga</i><br><i>Sedum/Sempervivum</i><br><i>Thymus</i> |

Table S3. Volatiles compounds detected in honeys (Rt, retention time).

| COMPOUNDS                 | CAS NUMBER | Rt    | CODE SAMPLES |       |       |       |        |       |        |       |        |       |        |       |
|---------------------------|------------|-------|--------------|-------|-------|-------|--------|-------|--------|-------|--------|-------|--------|-------|
|                           |            |       | A            |       | B     |       | C      |       | D      |       | E      |       | F      |       |
|                           |            |       | mean         | ±SD   | mean  | ±SD   | mean   | ±SD   | mean   | ±SD   | mean   | ±SD   | mean   | ±SD   |
| <i>Alcohols</i>           |            |       |              |       |       |       |        |       |        |       |        |       |        |       |
| 1-Octanol                 | 111-87-5   | 2.53  | 0.037        | 0.014 | 0.000 | 0.000 | 0.000  | 0.000 | 0.110  | 0.035 | 0.012  | 0.002 | 0.000  | 0.000 |
| Nonanol                   | 111-84-2   | 3.23  | 0.000        | 0.000 | 0.001 | 0.000 | 0.000  | 0.000 | 0.086  | 0.013 | 0.033  | 0.013 | 0.147  | 0.066 |
| 2-Propanol                | 67-63-0    | 3.70  | 0.034        | 0.002 | 0.031 | 0.005 | 0.055  | 0.032 | 0.115  | 0.060 | 0.121  | 0.014 | 0.093  | 0.021 |
| Ethanol                   | 64-17-5    | 3.80  | 2.537        | 0.630 | 5.635 | 0.382 | 20.917 | 0.245 | 11.790 | 0.406 | 11.613 | 0.632 | 9.279  | 0.566 |
| 2-Methyl-3-buten-2-ol     | 115-18-4   | 7.35  | 0.569        | 0.084 | 0.214 | 0.005 | 1.090  | 0.120 | 2.888  | 2.308 | 1.260  | 0.137 | 0.476  | 0.089 |
| Isobutanol                | 78-83-1    | 10.38 | 0.066        | 0.011 | 0.189 | 0.018 | 0.390  | 0.008 | 0.143  | 0.210 | 0.221  | 0.031 | 0.187  | 0.072 |
| 2-Butanol                 | 78-92-2    | 10.46 | 0.001        | 0.000 | 0.047 | 0.006 | 0.000  | 0.000 | 0.271  | 0.227 | 0.001  | 0.000 | 0.040  | 0.035 |
| 3-Pentanol                | 584-02-1   | 11.08 | 0.016        | 0.004 | 0.000 | 0.000 | 0.001  | 0.000 | 0.080  | 0.044 | 0.001  | 0.000 | 0.083  | 0.029 |
| 1-Methoxy-2-Propanol      | 107-98-2   | 11.48 | 0.000        | 0.000 | 0.000 | 0.000 | 0.000  | 0.000 | 0.000  | 0.000 | 0.021  | 0.006 | 0.001  | 0.000 |
| 2-Pentanol                | 6032-29-7  | 11.69 | 0.011        | 0.003 | 0.000 | 0.000 | 0.013  | 0.002 | 0.139  | 0.024 | 0.001  | 0.000 | 0.054  | 0.004 |
| 1-Butanol                 | 71-36-3    | 12.73 | 0.048        | 0.014 | 0.000 | 0.000 | 0.128  | 0.030 | 0.249  | 0.054 | 0.114  | 0.020 | 0.063  | 0.010 |
| 1-Penten-3-ol             | 616-25-1   | 13.47 | 0.028        | 0.012 | 0.052 | 0.016 | 0.006  | 0.002 | 0.062  | 0.026 | 0.016  | 0.004 | 0.053  | 0.022 |
| 2-Hexanol                 | 626-93-7   | 13.84 | 0.007        | 0.002 | 0.027 | 0.005 | 0.025  | 0.002 | 0.029  | 0.007 | 0.022  | 0.004 | 0.018  | 0.005 |
| Isoamyl alcohol           | 123-51-3   | 15.44 | 0.232        | 0.071 | 0.802 | 0.062 | 0.755  | 0.102 | 1.938  | 0.216 | 0.848  | 0.067 | 1.087  | 0.075 |
| 3-Methyl-3-buten-2-ol     | 763-32-6   | 16.79 | 0.378        | 0.101 | 0.127 | 0.031 | 0.853  | 0.125 | 0.205  | 0.058 | 2.181  | 0.143 | 2.838  | 0.040 |
| 1-Pentanol                | 71-41-0    | 16.95 | 0.001        | 0.000 | 0.001 | 0.000 | 0.001  | 0.000 | 0.004  | 0.000 | 0.000  | 0.000 | 0.001  | 0.000 |
| E- 2-Methyl-3-penten-1-ol | 62238-37-3 | 18.57 | 0.000        | 0.000 | 0.000 | 0.000 | 0.000  | 0.000 | 0.146  | 0.026 | 0.007  | 0.002 | 0.272  | 0.025 |
| Prenol                    | 4675-87-0  | 19.08 | 0.192        | 0.045 | 0.001 | 0.000 | 1.015  | 0.178 | 0.007  | 0.001 | 0.008  | 0.002 | 0.043  | 0.009 |
| 2-Heptanol                | 543-49-7   | 19.18 | 0.027        | 0.007 | 0.043 | 0.006 | 0.389  | 0.011 | 0.093  | 0.018 | 0.022  | 0.001 | 0.104  | 0.005 |
| 2-Butoxyethanol           | 111-76-2   | 21.23 | 0.100        | 0.012 | 0.045 | 0.024 | 0.001  | 0.000 | 0.000  | 0.000 | 0.022  | 0.007 | 0.000  | 0.000 |
| 2-Cyclopropyl-2-pentanol  | 24230-08-8 | 21.68 | 0.000        | 0.000 | 0.148 | 0.003 | 0.091  | 0.012 | 0.001  | 0.000 | 0.000  | 0.000 | 0.192  | 0.036 |
| Hotrienol                 | 20053-88-7 | 25.95 | 0.668        | 0.081 | 0.967 | 0.145 | 0.901  | 0.186 | 4.683  | 0.481 | 1.200  | 0.105 | 3.270  | 0.456 |
| 2-Phenylpropan-2-ol       | 617-94-7   | 28.77 | 0.001        | 0.000 | 0.032 | 0.003 | 0.006  | 0.008 | 0.000  | 0.000 | 0.001  | 0.000 | 0.001  | 0.000 |
| 1-Phenylethanol           | 98-85-1    | 29.86 | 0.001        | 0.000 | 0.001 | 0.000 | 0.001  | 0.000 | 0.000  | 0.000 | 0.001  | 0.000 | 6.591  | 0.580 |
| Benzyl alcohol            | 100-51-6   | 31.02 | 1.798        | 0.569 | 0.076 | 0.005 | 3.352  | 0.902 | 3.826  | 1.057 | 0.000  | 0.000 | 4.854  | 1.463 |
| 2-Phenylethanol           | 60-12-8    | 31.69 | 1.017        | 0.963 | 0.443 | 0.060 | 1.596  | 0.448 | 0.995  | 0.129 | 2.684  | 0.265 | 2.324  | 0.278 |
| <i>Aldehydes</i>          |            |       |              |       |       |       |        |       |        |       |        |       |        |       |
| Ethanal                   | 75-07-0    | 1.73  | 0.130        | 0.087 | 0.163 | 0.010 | 0.479  | 0.013 | 0.298  | 0.034 | 0.403  | 0.020 | 0.387  | 0.053 |
| Butanal                   | 123-72-8   | 2.85  | 0.000        | 0.000 | 0.001 | 0.000 | 0.001  | 0.000 | 0.001  | 0.000 | 0.001  | 0.000 | 0.015  | 0.006 |
| 2-Methyl-butanal          | 96-17-3    | 3.33  | 0.027        | 0.003 | 0.040 | 0.003 | 0.021  | 0.008 | 0.069  | 0.014 | 0.083  | 0.014 | 0.576  | 0.010 |
| 3-Methylbutanal           | 590-86-3   | 3.42  | 0.028        | 0.008 | 0.070 | 0.002 | 0.087  | 0.017 | 0.263  | 0.029 | 0.127  | 0.018 | 1.092  | 0.074 |
| Pentanal                  | 110-62-3   | 4.77  | 0.000        | 0.000 | 0.000 | 0.000 | 0.000  | 0.000 | 0.006  | 0.001 | 0.001  | 0.000 | 0.001  | 0.000 |
| Hexanal                   | 66-25-1    | 8.99  | 0.060        | 0.017 | 0.122 | 0.029 | 0.082  | 0.016 | 0.082  | 0.058 | 0.287  | 0.033 | 0.402  | 0.043 |
| 2-Methyl- 2-butenal       | 1115-11-3  | 9.32  | 0.063        | 0.013 | 0.129 | 0.018 | 0.114  | 0.015 | 0.129  | 0.051 | 1.385  | 0.126 | 0.814  | 0.118 |
| Heptanal                  | 111-71-7   | 14.06 | 0.130        | 0.048 | 0.175 | 0.016 | 0.084  | 0.014 | 0.114  | 0.028 | 0.182  | 0.045 | 0.309  | 0.032 |
| 3-Methyl-2-butenal        | 107-86-8   | 14.44 | 0.233        | 0.065 | 0.260 | 0.131 | 0.317  | 0.046 | 0.243  | 0.066 | 1.172  | 0.201 | 0.656  | 0.094 |
| Octanal                   | 124-13-0   | 17.97 | 0.132        | 0.071 | 0.302 | 0.085 | 0.115  | 0.021 | 0.136  | 0.007 | 0.318  | 0.078 | 0.317  | 0.037 |
| 1-Formylcyclopentene      | ID#: 4768  | 18.28 | 0.000        | 0.000 | 0.057 | 0.008 | 0.000  | 0.000 | 0.014  | 0.005 | 0.094  | 0.009 | 0.020  | 0.006 |
| Nonanal                   | 124-19-6   | 20.98 | 2.349        | 0.521 | 8.616 | 1.051 | 3.878  | 0.522 | 7.947  | 1.798 | 11.034 | 1.371 | 16.436 | 3.173 |

|                                         |                 |       |        |       |        |       |        |       |        |       |        |       |        |       |
|-----------------------------------------|-----------------|-------|--------|-------|--------|-------|--------|-------|--------|-------|--------|-------|--------|-------|
| Furfural                                | 98-01-1         | 22.59 | 1.071  | 0.302 | 3.018  | 0.400 | 1.528  | 0.242 | 6.304  | 1.751 | 4.955  | 0.233 | 10.830 | 2.116 |
| Decanal                                 | 112-31-2        | 23.53 | 0.335  | 0.096 | 0.001  | 0.000 | 0.000  | 0.000 | 0.000  | 0.000 | 0.000  | 0.000 | 0.000  | 0.000 |
| Benzaldehyde                            | 100-52-7        | 23.95 | 1.754  | 0.393 | 9.390  | 0.943 | 2.019  | 0.223 | 11.003 | 2.821 | 8.527  | 0.314 | 29.157 | 6.360 |
| Lilac Aldehyde                          | 67920-63-2      | 24.39 | 1.842  | 0.401 | 4.311  | 0.138 | 1.522  | 0.625 | 5.931  | 0.843 | 3.436  | 0.135 | 6.957  | 0.719 |
| Lilac Aldehyde isomer                   |                 | 24.66 | 1.392  | 0.259 | 4.393  | 0.160 | 1.654  | 0.121 | 0.000  | 0.000 | 0.001  | 0.000 | 4.975  | 0.382 |
| Undecanal                               | 112-44-7        | 25.82 | 0.009  | 0.001 | 0.057  | 0.015 | 0.004  | 0.001 | 0.103  | 0.029 | 0.094  | 0.022 | 0.467  | 0.062 |
| Myrtenal                                | 564-94-3        | 26.10 | 0.006  | 0.001 | 0.001  | 0.000 | 0.001  | 0.000 | 0.001  | 0.000 | 0.030  | 0.004 | 0.000  | 0.000 |
| 2-Phenyl ethanal                        | 122-78-1        | 26.38 | 1.289  | 0.254 | 1.734  | 0.125 | 0.830  | 0.175 | 1.679  | 0.287 | 4.514  | 0.383 | 10.369 | 1.375 |
| Cumaldehyde                             | 122-03-2        | 26.64 | 0.001  | 0.000 | 0.000  | 0.000 | 0.000  | 0.000 | 0.000  | 0.000 | 0.000  | 0.000 | 0.046  | 0.004 |
| Salicylaldehyde                         | 90-02-8         | 27.07 | 0.010  | 0.001 | 0.234  | 0.051 | 0.028  | 0.006 | 0.167  | 0.023 | 0.204  | 0.027 | 0.545  | 0.097 |
| Nicotinaldehyde                         | 500-22-1        | 27.59 | 0.000  | 0.000 | 6.651  | 1.061 | 0.157  | 0.022 | 2.597  | 0.384 | 7.876  | 1.310 | 3.014  | 0.648 |
| 2-(4'-Methylphenyl)-propanal            | ID#: 32380      | 28.29 | 0.000  | 0.000 | 0.001  | 0.000 | 0.001  | 0.000 | 0.001  | 0.000 | 0.000  | 0.000 | 2.134  | 0.516 |
| 3-Phenylpropionaldehyde                 | 104-53-0        | 29.09 | 0.000  | 0.000 | 0.020  | 0.004 | 0.000  | 0.000 | 0.000  | 0.000 | 0.000  | 0.000 | 0.392  | 0.038 |
| 2-Caren-10-al                           | ID WILEY 387175 | 29.39 | 0.000  | 0.000 | 0.000  | 0.000 | 0.036  | 0.009 | 0.001  | 0.000 | 0.001  | 0.000 | 0.082  | 0.035 |
| 2-Phenyl-2-butenal                      | 4411-89-6       | 31.21 | 0.000  | 0.000 | 0.000  | 0.000 | 0.001  | 0.000 | 0.000  | 0.000 | 0.014  | 0.006 | 0.386  | 0.084 |
| Anisaldehyde                            | 123-11-5        | 32.67 | 0.001  | 0.000 | 0.033  | 0.022 | 0.000  | 0.000 | 0.000  | 0.000 | 0.000  | 0.000 | 0.000  | 0.000 |
| Cinnamaldehyde                          | 104-55-2        | 32.81 | 0.036  | 0.005 | 0.065  | 0.014 | 0.136  | 0.032 | 0.081  | 0.031 | 0.464  | 0.088 | 0.903  | 0.255 |
| Lilial aldehyde                         | 80-54-6         | 32.93 | 0.006  | 0.001 | 0.001  | 0.000 | 0.000  | 0.000 | 0.016  | 0.002 | 0.001  | 0.000 | 0.001  | 0.000 |
| 5-hydroxymethylfurfural                 | 67-47-0         | 39.36 | 0.001  | 0.000 | 0.001  | 0.000 | 0.001  | 0.000 | 0.001  | 0.000 | 0.032  | 0.014 | 0.001  | 0.000 |
| Vanillin                                | 121-33-5        | 40.46 | 0.000  | 0.000 | 0.001  | 0.000 | 0.000  | 0.000 | 0.115  | 0.043 | 0.009  | 0.004 | 0.019  | 0.008 |
| <i>Anidrides</i>                        |                 |       |        |       |        |       |        |       |        |       |        |       |        |       |
| Glutaconic anhydride                    | 5926-95-4       | 32.33 | 0.000  | 0.001 | 0.035  | 0.012 | 0.025  | 0.012 | 0.291  | 0.056 | 0.074  | 0.029 | 0.000  | 0.000 |
| <i>Aromatics</i>                        |                 |       |        |       |        |       |        |       |        |       |        |       |        |       |
| Ethyl-benzene                           | 100-41-4        | 10.87 | 0.006  | 0.000 | 0.000  | 0.000 | 0.001  | 0.000 | 0.001  | 0.000 | 0.012  | 0.005 | 0.011  | 0.000 |
| p-Xylene                                | 106-42-3        | 11.55 | 0.001  | 0.000 | 0.000  | 0.000 | 0.001  | 0.000 | 0.063  | 0.014 | 0.028  | 0.006 | 0.024  | 0.000 |
| Pyridin                                 | 110-86-1        | 13.79 | 0.000  | 0.000 | 0.001  | 0.002 | 0.000  | 0.000 | 0.001  | 0.000 | 0.006  | 0.000 | 0.012  | 0.003 |
| 2-pentyl-furan                          | 3777-69-3       | 16.14 | 0.001  | 0.000 | 0.015  | 0.005 | 0.011  | 0.004 | 0.025  | 0.008 | 0.001  | 0.000 | 0.045  | 0.005 |
| 1,2-Dihydro-1,1,6-trimethyl-naphthalene | 30364-38-6      | 28.51 | 0.001  | 0.000 | 0.001  | 0.000 | 0.001  | 0.000 | 0.336  | 0.032 | 0.001  | 0.000 | 0.001  | 0.000 |
| Imidazole                               | 288-32-4        | 29.44 | 0.000  | 0.000 | 0.000  | 0.000 | 0.000  | 0.000 | 0.000  | 0.000 | 0.000  | 0.000 | 0.082  | 0.013 |
| α-Naphthol                              | 90-15-3         |       | 0.006  | 0.001 | 0.000  | 0.000 | 0.006  | 0.001 | 0.000  | 0.000 | 0.000  | 0.000 | 0.109  | 0.062 |
| β-Naphthol                              | 135-19-3        | 30.47 | 0.001  | 0.000 | 0.000  | 0.000 | 0.003  | 0.001 | 0.000  | 0.000 | 0.001  | 0.000 | 0.244  | 0.048 |
| 4-Methoxyphenol                         | 150-76-5        | 30.55 | 0.001  | 0.000 | 0.001  | 0.000 | 0.001  | 0.000 | 0.001  | 0.000 | 0.015  | 0.004 | 0.090  | 0.016 |
| 1,4-Dimethoxybenzene                    | 150-78-7        | 31.96 | 0.128  | 0.110 | 0.048  | 0.007 | 0.096  | 0.027 | 0.044  | 0.002 | 0.000  | 0.000 | 0.000  | 0.000 |
| Phenol                                  | 108-95-2        | 32.50 | 0.041  | 0.008 | 0.080  | 0.020 | 0.127  | 0.045 | 1.754  | 0.078 | 0.158  | 0.037 | 1.294  | 0.342 |
| m-Cresol                                | 108-39-4        | 33.23 | 0.270  | 0.086 | 0.010  | 0.003 | 0.022  | 0.004 | 0.355  | 0.080 | 0.028  | 0.005 | 0.194  | 0.032 |
| p-Cresol                                | 106-44-5        | 33.30 | 0.000  | 0.000 | 0.000  | 0.000 | 0.001  | 0.000 | 0.001  | 0.000 | 0.007  | 0.002 | 0.094  | 0.028 |
| 2,6-Di-t-butyl-4-methylphenol           | 128-37-0        | 33.48 | 0.029  | 0.003 | 0.026  | 0.006 | 0.039  | 0.012 | 0.075  | 0.006 | 0.030  | 0.017 | 0.191  | 0.027 |
| 4-Ethyl phenol                          | 123-07-9        | 34.18 | 0.000  | 0.000 | 0.000  | 0.000 | 0.000  | 0.000 | 0.001  | 0.000 | 0.001  | 0.000 | 0.000  | 0.000 |
| Thymol                                  | 89-83-8         | 34.32 | 0.041  | 0.009 | 0.044  | 0.006 | 0.113  | 0.018 | 2.738  | 0.117 | 0.409  | 0.087 | 2.118  | 0.417 |
| 2-Acetyl-4-Methylphenol                 | 1450-72-2       | 34.43 | 0.213  | 0.067 | 0.341  | 0.039 | 0.400  | 0.140 | 0.000  | 0.000 | 0.000  | 0.000 | 0.000  | 0.000 |
| 2-Methoxy-4-vinylphenol                 | 7786-61-0       | 34.40 | 0.000  | 0.000 | 0.000  | 0.000 | 0.000  | 0.000 | 3.695  | 0.136 | 0.376  | 0.087 | 2.745  | 0.488 |
| Carvacrol                               | 499-75-2        | 34.64 | 0.071  | 0.025 | 0.093  | 0.016 | 0.235  | 0.059 | 0.294  | 0.021 | 0.205  | 0.030 | 0.091  | 0.011 |
| 2,4-Di-tert-butylphenol                 | 96-76-4         | 35.98 | 0.014  | 0.001 | 0.019  | 0.006 | 0.040  | 0.016 | 0.053  | 0.002 | 0.044  | 0.002 | 0.091  | 0.020 |
| 3,4,5-Trimethylphenol                   | 527-54-8        | 36.73 | 0.000  | 0.000 | 0.000  | 0.000 | 0.001  | 0.000 | 0.053  | 0.013 | 0.001  | 0.000 | 0.011  | 0.017 |
| 2-ethyl-5-propyl-phenol                 | 72386-20-0      | 38.50 | 0.000  | 0.000 | 0.000  | 0.000 | 0.000  | 0.000 | 0.000  | 0.000 | 0.000  | 0.000 | 0.055  | 0.019 |
| <i>Carboxylic acids</i>                 |                 |       |        |       |        |       |        |       |        |       |        |       |        |       |
| 2,2-Dimethyl-propanoic acid             | 15784-26-6      | 5.09  | 0.026  | 0.008 | 0.063  | 0.015 | 0.027  | 0.009 | 0.039  | 0.004 | 0.080  | 0.031 | 0.001  | 0.000 |
| Acetic acid                             | 64-19-7         | 22.18 | 11.542 | 3.977 | 17.676 | 3.746 | 32.282 | 5.106 | 41.401 | 0.843 | 25.426 | 0.811 | 81.891 | 4.069 |

|                                          |            |       |       |       |       |       |       |       |        |       |       |       |        |       |
|------------------------------------------|------------|-------|-------|-------|-------|-------|-------|-------|--------|-------|-------|-------|--------|-------|
| Formic acid                              | 64-18-6    | 23.46 | 0.000 | 0.000 | 1.229 | 0.413 | 0.081 | 0.027 | 5.083  | 0.375 | 1.426 | 0.307 | 20.018 | 3.744 |
| Propanoic acid                           | 79-09-4    | 24.25 | 1.527 | 0.316 | 2.223 | 0.448 | 2.376 | 0.296 | 3.640  | 0.466 | 3.417 | 0.360 | 4.329  | 0.210 |
| 2-Methylpropanoic acid                   | 79-31-2    | 24.94 | 0.184 | 0.108 | 0.581 | 0.132 | 1.160 | 0.038 | 3.262  | 0.219 | 1.199 | 0.034 | 6.350  | 0.552 |
| Pivalic acid                             | 75-98-9    | 25.18 | 3.168 | 0.976 | 5.076 | 0.971 | 4.794 | 0.414 | 3.751  | 0.348 | 6.739 | 0.485 | 4.682  | 0.463 |
| Butanoic acid                            | 107-92-6   | 26.17 | 1.128 | 0.281 | 1.922 | 0.374 | 5.009 | 0.504 | 21.285 | 1.371 | 3.034 | 0.013 | 8.474  | 0.785 |
| Propenoic acid                           | 79-10-7    | 26.31 | 0.001 | 0.000 | 0.001 | 0.000 | 0.001 | 0.000 | 0.072  | 0.014 | 0.025 | 0.005 | 0.456  | 0.093 |
| 3-Methyl-butanoic acid                   | 503-74-2   | 27.03 | 0.554 | 0.378 | 2.380 | 0.328 | 3.722 | 0.789 | 6.664  | 0.127 | 2.386 | 0.381 | 14.230 | 1.408 |
| 2-Methyl-butanoic acid                   | 116-53-0   | 27.04 | 0.532 | 0.363 | 1.382 | 0.210 | 1.948 | 0.413 | 3.912  | 0.137 | 1.685 | 0.240 | 12.448 | 1.320 |
| Pentanoic acid                           | 109-52-4   | 28.33 | 0.329 | 0.139 | 0.532 | 0.140 | 0.833 | 0.028 | 1.382  | 0.320 | 1.176 | 0.132 | 2.075  | 0.328 |
| 2-Methyl-pentanoic acid                  | 97-61-0    | 28.92 | 0.006 | 0.003 | 0.043 | 0.003 | 0.019 | 0.005 | 0.016  | 0.005 | 0.030 | 0.002 | 0.212  | 0.032 |
| Crotonic acid                            | 3724-65-0  | 28.94 | 0.003 | 0.001 | 0.029 | 0.003 | 0.015 | 0.004 | 0.033  | 0.002 | 0.021 | 0.003 | 0.117  | 0.014 |
| 2-Methyl-2-butenoic acid                 | 13201-46-2 | 29.25 | 0.018 | 0.001 | 0.005 | 0.001 | 0.032 | 0.008 | 0.008  | 0.012 | 0.000 | 0.000 | 0.096  | 0.014 |
| 3-Methyl-pentanoic acid                  | 105-43-1   | 29.42 | 0.029 | 0.018 | 0.039 | 0.007 | 0.306 | 0.135 | 0.365  | 0.043 | 0.338 | 0.087 | 0.431  | 0.060 |
| 3-Methyl-2-butenoic acid                 | 541-47-9   | 29.36 | 0.034 | 0.018 | 0.060 | 0.006 | 0.112 | 0.049 | 0.439  | 0.048 | 0.330 | 0.024 | 0.812  | 0.150 |
| 4-Methyl-pentanoic acid                  | 646-07-1   | 29.54 | 0.000 | 0.000 | 0.000 | 0.000 | 0.040 | 0.024 | 0.080  | 0.014 | 0.056 | 0.013 | 0.154  | 0.021 |
| Hexanoic acid                            | 142-62-1   | 30.33 | 0.261 | 0.122 | 1.026 | 0.320 | 1.547 | 0.823 | 18.796 | 2.034 | 1.675 | 0.333 | 7.978  | 1.125 |
| 2-Methyl-(E)-2-pentenoic acid            | 16957-70-3 | 30.82 | 0.000 | 0.000 | 0.000 | 0.000 | 0.000 | 0.000 | 0.001  | 0.000 | 0.000 | 0.000 | 0.070  | 0.025 |
| Heptanoic acid                           | 111-14-8   | 31.96 | 0.115 | 0.138 | 0.116 | 0.016 | 0.163 | 0.046 | 1.454  | 0.086 | 0.272 | 0.039 | 2.772  | 0.434 |
| 3-Hexenoic acid                          | 1577-18-0  | 31.99 | 0.000 | 0.000 | 0.004 | 0.001 | 0.010 | 0.003 | 0.756  | 0.100 | 0.009 | 0.002 | 0.494  | 0.074 |
| 2-Hexenoic acid                          | 13419-69-7 | 32.02 | 0.227 | 0.219 | 0.139 | 0.019 | 0.000 | 0.000 | 0.033  | 0.007 | 0.000 | 0.000 | 0.083  | 0.014 |
| Octanoic acid                            | 124-07-2   | 33.05 | 0.006 | 0.000 | 0.023 | 0.014 | 0.027 | 0.030 | 7.906  | 2.545 | 0.045 | 0.007 | 3.912  | 0.524 |
| 7-Octenoic acid                          | 18719-24-9 | 33.62 | 0.000 | 0.000 | 0.000 | 0.000 | 0.000 | 0.000 | 0.062  | 0.017 | 0.001 | 0.000 | 0.238  | 0.035 |
| Hexa-2,4-Dienoic acid                    | 110-44-1   | 33.77 | 0.000 | 0.000 | 0.000 | 0.000 | 0.000 | 0.000 | 0.303  | 0.046 | 0.000 | 0.000 | 0.000  | 0.000 |
| Hexa-2,4-Dienoic acid isomer             |            | 33.82 | 0.000 | 0.000 | 0.000 | 0.000 | 0.000 | 0.000 | 13.234 | 1.586 | 0.536 | 0.216 | 0.001  | 0.000 |
| Nonanoic acid                            | 112-05-0   | 34.11 | 0.001 | 0.000 | 0.000 | 0.000 | 0.059 | 0.041 | 1.998  | 0.984 | 0.107 | 0.028 | 6.413  | 1.356 |
| n-Decanoic acid                          | 334-48-5   | 35.34 | 0.000 | 0.000 | 0.000 | 0.000 | 0.000 | 0.000 | 0.997  | 0.868 | 0.011 | 0.005 | 0.155  | 0.085 |
| 2-Nonenoic acid                          | 3760-11-0  | 35.57 | 0.000 | 0.000 | 0.000 | 0.000 | 0.000 | 0.000 | 0.000  | 0.000 | 0.016 | 0.003 | 0.198  | 0.086 |
| Nerolic acid                             | 4613-38-1  | 36.30 | 0.000 | 0.000 | 0.000 | 0.000 | 0.000 | 0.000 | 0.054  | 0.010 | 0.000 | 0.000 | 0.449  | 0.101 |
| Benzoic acid                             | 65-85-0    | 38.26 | 0.029 | 0.010 | 0.218 | 0.038 | 0.088 | 0.028 | 10.260 | 0.676 | 0.183 | 0.076 | 10.993 | 1.652 |
| Dodecanoic acid                          | 143-07-7   | 39.11 | 0.000 | 0.000 | 0.000 | 0.000 | 0.000 | 0.000 | 0.108  | 0.103 | 0.000 | 0.000 | 0.000  | 0.000 |
| Phenylacetic acid                        | 103-82-2   | 40.85 | 0.000 | 0.000 | 0.000 | 0.000 | 0.000 | 0.000 | 0.032  | 0.005 | 0.001 | 0.000 | 0.177  | 0.060 |
| <i>Esters</i>                            |            |       |       |       |       |       |       |       |        |       |       |       |        |       |
| Methyl acetate                           | 79-20-9    | 2.37  | 0.000 | 0.000 | 0.000 | 0.000 | 0.000 | 0.000 | 0.070  | 0.015 | 0.077 | 0.021 | 0.107  | 0.051 |
| Ethyl acetate                            | 141-78-6   | 3.01  | 0.238 | 0.024 | 0.296 | 0.015 | 0.363 | 0.047 | 0.355  | 0.026 | 0.315 | 0.034 | 0.494  | 0.072 |
| Methyl hexanoate                         | 106-70-7   | 14.34 | 0.003 | 0.001 | 0.000 | 0.000 | 0.000 | 0.000 | 0.144  | 0.021 | 0.012 | 0.014 | 0.038  | 0.001 |
| Ethyl hexanoate                          | 123-66-0   | 16.29 | 0.000 | 0.000 | 0.000 | 0.000 | 0.001 | 0.000 | 0.049  | 0.006 | 0.000 | 0.000 | 0.001  | 0.000 |
| Ethyl lactate                            | 97-64-3    | 19.64 | 0.022 | 0.012 | 0.019 | 0.003 | 0.604 | 0.067 | 0.107  | 0.016 | 0.003 | 0.000 | 0.048  | 0.007 |
| 4,6-Dimethyltetrahydro-2H-pyran-2-one    | 3720-20-5  | 21.92 | 0.024 | 0.010 | 0.036 | 0.012 | 0.041 | 0.008 | 0.052  | 0.015 | 0.022 | 0.003 | 0.052  | 0.009 |
| Methyl nonanoate                         | 1731-84-6  | 23.44 | 0.015 | 0.007 | 0.048 | 0.011 | 0.007 | 0.001 | 0.128  | 0.036 | 0.042 | 0.007 | 0.046  | 0.080 |
| $\gamma$ -Valerolactone                  | 108-29-2   | 25.60 | 0.085 | 0.030 | 0.147 | 0.007 | 0.342 | 0.040 | 0.882  | 0.202 | 0.222 | 0.016 | 1.013  | 0.210 |
| Methyl benzoate                          | 93-58-3    | 26.06 | 0.001 | 0.000 | 0.001 | 0.000 | 0.000 | 0.000 | 0.014  | 0.004 | 0.001 | 0.000 | 0.083  | 0.024 |
| Ethyl decanoate                          | 110-38-3   | 26.59 | 0.000 | 0.000 | 0.000 | 0.000 | 0.000 | 0.000 | 0.250  | 0.171 | 0.000 | 0.000 | 0.000  | 0.000 |
| $\gamma$ -Vinyl- $\gamma$ -valerolactone | 1073-11-6  | 26.85 | 0.374 | 0.091 | 0.603 | 0.022 | 0.400 | 0.075 | 1.873  | 0.107 | 0.183 | 0.018 | 2.411  | 0.316 |
| Ethyl benzoate                           | 93-89-0    | 26.98 | 0.000 | 0.001 | 0.049 | 0.012 | 0.079 | 0.017 | 0.001  | 0.000 | 0.001 | 0.000 | 0.001  | 0.000 |
| $\gamma$ -Caprolactone                   | 695-06-7   | 27.47 | 0.039 | 0.065 | 0.250 | 0.024 | 0.372 | 0.066 | 0.796  | 0.054 | 0.196 | 0.171 | 1.097  | 0.185 |
| $\gamma$ -Crotonlactone                  | 497-23-4   | 28.45 | 0.001 | 0.000 | 0.001 | 0.000 | 0.023 | 0.001 | 0.023  | 0.006 | 0.033 | 0.008 | 0.056  | 0.008 |
| Methyl salicylate                        | 119-36-8   | 29.01 | 0.071 | 0.022 | 0.020 | 0.003 | 0.047 | 0.011 | 0.624  | 0.284 | 0.056 | 0.048 | 0.052  | 0.005 |
| Laurate                                  | 111-82-0   | 29.73 | 0.001 | 0.000 | 0.001 | 0.000 | 0.000 | 0.000 | 0.452  | 0.229 | 0.003 | 0.001 | 0.001  | 0.000 |



|                                              |             |       |       |       |       |       |       |       |       |       |       |       |        |       |
|----------------------------------------------|-------------|-------|-------|-------|-------|-------|-------|-------|-------|-------|-------|-------|--------|-------|
| Phenethyl acetate                            | 103-45-7    | 29.83 | 0.001 | 0.000 | 0.000 | 0.000 | 0.029 | 0.006 | 0.020 | 0.006 | 0.001 | 0.000 | 0.000  | 0.000 |
| Pantolactone                                 | 52126-90-6  | 32.71 | 0.001 | 0.000 | 0.001 | 0.000 | 0.042 | 0.016 | 1.189 | 0.244 | 0.191 | 0.129 | 0.414  | 0.158 |
| 1-(4-Isopropylphenyl)-2-methylpropyl acetate | ID#: 311526 | 33.09 | 0.070 | 0.004 | 0.069 | 0.008 | 0.166 | 0.020 | 0.001 | 0.000 | 0.034 | 0.005 | 0.001  | 0.000 |
| Dihydropentalactone                          | 21950-33-4  | 33.54 | 0.019 | 0.005 | 0.021 | 0.004 | 0.000 | 0.000 | 0.000 | 0.000 | 0.000 | 0.000 | 0.000  | 0.000 |
| Methyl citronellate                          | 2270-60-2   | 35.04 | 0.000 | 0.000 | 0.000 | 0.000 | 0.000 | 0.000 | 0.000 | 0.000 | 0.000 | 0.000 | 0.174  | 0.043 |
| Diethyl phthalate                            | 84-66-2     | 36.81 | 0.021 | 0.003 | 0.022 | 0.001 | 0.001 | 0.000 | 0.032 | 0.009 | 0.029 | 0.022 | 0.127  | 0.006 |
| Sparassol                                    | 520-43-4    | 37.01 | 0.018 | 0.010 | 0.010 | 0.002 | 0.013 | 0.004 | 0.023 | 0.004 | 0.012 | 0.005 | 0.011  | 0.001 |
| Butyl hexadecanoate                          | 111-06-8    | 38.18 | 0.000 | 0.000 | 0.000 | 0.000 | 0.000 | 0.000 | 0.001 | 0.000 | 0.000 | 0.000 | 0.316  | 0.311 |
| Diisobutyl phthalate                         | 84-69-5     | 40.41 | 0.009 | 0.001 | 0.001 | 0.000 | 0.001 | 0.000 | 0.022 | 0.010 | 0.014 | 0.007 | 0.081  | 0.027 |
| Benzyl benzoate                              | 120-51-4    | 42.59 | 0.000 | 0.000 | 0.001 | 0.000 | 0.000 | 0.000 | 0.032 | 0.010 | 0.000 | 0.000 | 0.031  | 0.009 |
| Stearate                                     | 123-95-5    | 43.93 | 0.000 | 0.000 | 0.000 | 0.000 | 0.000 | 0.000 | 0.055 | 0.003 | 0.022 | 0.002 | 0.242  | 0.164 |
| <i>Ethers</i>                                |             |       |       |       |       |       |       |       |       |       |       |       |        |       |
| Diethyl ether                                | 60-29-7     | 2.40  | 0.000 | 0.000 | 0.000 | 0.000 | 0.027 | 0.002 | 0.000 | 0.000 | 0.000 | 0.000 | 0.000  | 0.000 |
| Dill ether                                   | 70786-44-6  | 23.71 | 0.114 | 0.030 | 0.136 | 0.016 | 0.135 | 0.017 | 0.624 | 0.111 | 0.074 | 0.015 | 0.409  | 0.074 |
| <i>Furanoids</i>                             |             |       |       |       |       |       |       |       |       |       |       |       |        |       |
| 2-Methylfuran                                | 534-22-5    | 2.81  | 0.000 | 0.000 | 0.000 | 0.000 | 0.000 | 0.000 | 0.000 | 0.000 | 0.000 | 0.000 | 0.364  | 0.032 |
| 3-Methylfuran                                | 930-27-8    | 3.12  | 0.184 | 0.057 | 0.145 | 0.008 | 0.285 | 0.009 | 0.426 | 0.022 | 0.256 | 0.021 | 1.474  | 0.043 |
| 2-Ethylfuran                                 | 3208-16-0   | 4.21  | 0.001 | 0.000 | 0.001 | 0.000 | 0.001 | 0.000 | 0.001 | 0.000 | 0.001 | 0.000 | 0.166  | 0.030 |
| z-Rose-oxide                                 | 16409-43-1  | 19.82 | 0.011 | 0.005 | 0.027 | 0.008 | 0.003 | 0.001 | 0.112 | 0.026 | 0.072 | 0.009 | 0.306  | 0.032 |
| Menthofuran                                  | 494-90-6    | 23.07 | 0.001 | 0.000 | 0.001 | 0.000 | 0.000 | 0.000 | 0.000 | 0.000 | 0.000 | 0.000 | 3.652  | 0.418 |
| 4,7-Dimethyl-benzofuran                      | 28715-26-6  | 27.68 | 0.001 | 0.000 | 0.195 | 0.067 | 0.000 | 0.000 | 0.001 | 0.000 | 0.000 | 0.000 | 0.747  | 0.155 |
| 4,5-Dimethyl-2-formylfuran                   | 52480-43-0  | 32.16 | 0.056 | 0.013 | 3.534 | 1.189 | 0.340 | 0.104 | 3.059 | 0.390 | 6.247 | 1.765 | 0.838  | 0.227 |
| 2,3-Dihydro-benzofuran                       | 496-16-2    | 37.09 | 0.001 | 0.000 | 0.029 | 0.002 | 0.028 | 0.014 | 0.506 | 0.059 | 0.015 | 0.005 | 0.709  | 0.113 |
| <i>Hydrocarbons</i>                          |             |       |       |       |       |       |       |       |       |       |       |       |        |       |
| n-Octane                                     | 111-65-9    | 2.19  | 0.122 | 0.037 | 0.254 | 0.055 | 0.064 | 0.011 | 0.668 | 0.161 | 0.210 | 0.033 | 2.146  | 0.229 |
| 1-Octene                                     | 111-66-0    | 2.52  | 0.001 | 0.000 | 0.064 | 0.006 | 0.039 | 0.005 | 0.184 | 0.007 | 0.051 | 0.004 | 0.366  | 0.078 |
| 2,2,3-Trimethyl-hexane                       | 16747-25-4  | 7.70  | 0.051 | 0.008 | 0.088 | 0.024 | 0.816 | 0.155 | 0.742 | 0.804 | 2.304 | 0.278 | 1.853  | 0.387 |
| 2,3,4-Trimethyl-decane                       | 62238-15-7  | 8.18  | 0.000 | 0.000 | 0.043 | 0.012 | 0.068 | 0.003 | 1.320 | 1.067 | 0.084 | 0.015 | 0.236  | 0.011 |
| 2,8-dimethyl-undecane                        | 17301-25-6  | 8.21  | 0.031 | 0.006 | 0.000 | 0.000 | 0.000 | 0.000 | 0.000 | 0.000 | 0.000 | 0.000 | 0.000  | 0.000 |
| n-Undecane                                   | 1120-21-4   | 10.03 | 0.001 | 0.000 | 0.016 | 0.007 | 0.011 | 0.001 | 0.057 | 0.033 | 0.021 | 0.001 | 0.040  | 0.003 |
| 1,3-Cyclopentadiene                          | 542-92-7    | 14.65 | 0.256 | 0.072 | 0.000 | 0.000 | 0.000 | 0.000 | 0.001 | 0.000 | 0.000 | 0.000 | 0.175  | 0.028 |
| E- 2-Methyl-3-penten-1-ol                    | 629-50-5    | 18.67 | 0.012 | 0.004 | 0.019 | 0.006 | 0.015 | 0.001 | 0.038 | 0.012 | 0.016 | 0.006 | 0.054  | 0.013 |
| Tetradecane                                  | 629-59-4    | 21.42 | 0.000 | 0.000 | 0.000 | 0.000 | 0.076 | 0.010 | 0.068 | 0.029 | 0.022 | 0.011 | 0.098  | 0.030 |
| 1,4-Dimethyl-4-acetyl-1-cyclohexene          | 43219-68-7  | 23.85 | 0.604 | 0.135 | 0.605 | 0.060 | 1.028 | 0.114 | 0.713 | 0.020 | 0.353 | 0.033 | 0.166  | 0.012 |
| Dodecane                                     | 112-40-3    | 15.15 | 0.041 | 0.017 | 0.125 | 0.025 | 0.001 | 0.000 | 0.343 | 0.042 | 0.055 | 0.012 | 0.185  | 0.039 |
| <i>Ketones</i>                               |             |       |       |       |       |       |       |       |       |       |       |       |        |       |
| Acetone                                      | 67-64-1     | 2.27  | 0.463 | 0.012 | 0.508 | 0.880 | 2.204 | 0.103 | 1.935 | 0.130 | 3.097 | 0.142 | 0.000  | 0.000 |
| 3-Methyl-2-butanone                          | 563-80-4    | 3.61  | 0.000 | 0.000 | 0.000 | 0.000 | 0.000 | 0.000 | 0.000 | 0.000 | 0.000 | 0.000 | 0.036  | 0.012 |
| 2-Pentanone                                  | 107-87-9    | 4.68  | 0.000 | 0.000 | 0.000 | 0.000 | 0.000 | 0.000 | 0.023 | 0.006 | 0.001 | 0.000 | 0.048  | 0.031 |
| Diacetyl                                     | 431-03-8    | 4.86  | 0.119 | 0.026 | 0.248 | 0.025 | 0.387 | 0.047 | 0.862 | 0.043 | 0.484 | 0.016 | 14.201 | 0.426 |
| E-3-Penten-2-one                             | 3102-33-8   | 11.09 | 0.001 | 0.000 | 0.000 | 0.000 | 0.000 | 0.000 | 0.007 | 0.011 | 0.057 | 0.027 | 0.139  | 0.012 |
| 4-Methyl-3-penten-2-one                      | 141-79-7    | 11.39 | 0.001 | 0.000 | 0.000 | 0.000 | 0.001 | 0.000 | 0.014 | 0.001 | 0.014 | 0.007 | 0.067  | 0.004 |
| 2-Heptanone                                  | 110-43-0    | 13.93 | 0.024 | 0.009 | 0.011 | 0.003 | 0.008 | 0.001 | 0.063 | 0.008 | 0.027 | 0.004 | 0.072  | 0.001 |
| 6-Methyl-2-heptanone                         | 928-68-7    | 16.24 | 0.050 | 0.025 | 0.064 | 0.007 | 0.013 | 0.000 | 0.002 | 0.001 | 0.021 | 0.004 | 0.048  | 0.011 |
| 2-Methyltetrahydro-3-furanone                | 3188-00-9   | 17.02 | 0.001 | 0.000 | 0.001 | 0.000 | 0.001 | 0.000 | 0.024 | 0.007 | 0.001 | 0.000 | 0.061  | 0.011 |
| 3-Hydroxy-2-butanone                         | 513-86-0    | 17.64 | 0.154 | 0.069 | 0.227 | 0.023 | 0.395 | 0.030 | 0.599 | 0.063 | 0.209 | 0.123 | 2.462  | 0.093 |
| 2-Octanone                                   | 111-13-7    | 17.82 | 0.010 | 0.005 | 0.007 | 0.002 | 0.000 | 0.000 | 0.024 | 0.005 | 0.011 | 0.003 | 0.054  | 0.012 |

|                                                  |            |       |       |       |       |       |       |       |       |       |       |       |       |       |
|--------------------------------------------------|------------|-------|-------|-------|-------|-------|-------|-------|-------|-------|-------|-------|-------|-------|
| 1-Hydroxyacetone                                 | 116-09-6   | 18.07 | 0.097 | 0.054 | 0.234 | 0.055 | 0.304 | 0.040 | 0.910 | 0.118 | 0.709 | 0.196 | 2.389 | 0.236 |
| 2,6-Dimethyl-4-hepten-3-one                      | 56259-14-4 | 18.90 | 0.000 | 0.000 | 0.001 | 0.000 | 0.000 | 0.000 | 0.000 | 0.000 | 0.005 | 0.001 | 0.027 | 0.003 |
| 6-Methyl-5-hepten-2-one                          | 110-93-0   | 19.42 | 0.010 | 0.002 | 0.012 | 0.003 | 0.008 | 0.001 | 0.024 | 0.004 | 0.011 | 0.001 | 0.038 | 0.005 |
| 4-Hydroxy-4-methyl-2-pentanone                   | 123-42-2   | 19.95 | 0.000 | 0.000 | 0.006 | 0.002 | 0.010 | 0.004 | 0.004 | 0.001 | 0.004 | 0.000 | 0.001 | 0.000 |
| Tetrahydro-3,5-dimethyl-2h-pyran-2-one           | 3290-57-1  | 20.27 | 0.065 | 0.023 | 0.008 | 0.001 | 0.094 | 0.019 | 0.014 | 0.001 | 0.008 | 0.004 | 0.008 | 0.001 |
| 2-Nonanone                                       | 821-55-6   | 20.84 | 0.048 | 0.014 | 0.000 | 0.000 | 0.000 | 0.000 | 0.262 | 0.048 | 0.006 | 0.000 | 0.088 | 0.039 |
| 3,5,5-Trimethyl-3-Cyclohexen-1-one               | 471-01-2   | 21.19 | 0.000 | 0.000 | 0.018 | 0.011 | 0.001 | 0.000 | 0.129 | 0.011 | 0.032 | 0.004 | 0.058 | 0.007 |
| 2-Cyclohexen-1-one                               | 930-68-7   | 21.67 | 0.000 | 0.000 | 0.062 | 0.007 | 0.073 | 0.010 | 0.001 | 0.000 | 0.000 | 0.000 | 0.457 | 0.074 |
| 3-Methyl-3-cyclohexen-1-one                      | 31883-98-4 | 21.63 | 0.001 | 0.000 | 0.020 | 0.001 | 0.242 | 0.033 | 0.165 | 0.007 | 0.143 | 0.008 | 0.063 | 0.012 |
| 2-Acetylfuran                                    | 1192-62-7  | 23.50 | 0.031 | 0.009 | 0.316 | 0.055 | 0.655 | 0.141 | 0.933 | 0.071 | 0.000 | 0.000 | 2.440 | 0.677 |
| 3-Methyl-2-cyclopenten-1-one                     | 2758-18-1  | 23.59 | 0.159 | 0.046 | 0.077 | 0.018 | 0.152 | 0.048 | 0.001 | 0.000 | 0.404 | 0.044 | 0.000 | 0.000 |
| $\alpha$ -Isophorone                             | 78-59-1    | 25.29 | 0.001 | 0.000 | 0.001 | 0.000 | 0.001 | 0.000 | 2.643 | 0.246 | 0.001 | 0.000 | 0.913 | 0.194 |
| Acetophenone                                     | 98-86-2    | 26.55 | 0.001 | 0.000 | 0.001 | 0.000 | 0.001 | 0.000 | 0.001 | 0.000 | 0.001 | 0.000 | 1.829 | 0.130 |
| 3,4-Dimethylacetophenone                         | 3637 01 2  | 27.18 | 0.001 | 0.000 | 0.001 | 0.000 | 0.023 | 0.005 | 0.000 | 0.000 | 0.001 | 0.000 | 0.446 | 0.080 |
| 4-Oxoisophorone                                  | 1125-21-9  | 27.38 | 0.157 | 0.229 | 0.982 | 0.123 | 0.815 | 0.145 | 2.104 | 0.144 | 0.413 | 0.359 | 2.620 | 0.313 |
| Verbenone                                        | 80-57-9    | 27.60 | 0.931 | 0.677 | 0.093 | 0.004 | 0.057 | 0.008 | 0.022 | 0.002 | 0.009 | 0.001 | 0.057 | 0.010 |
| 3,4-Dimethyl-2,5-Furandione                      | 766-39-2   | 27.98 | 0.000 | 0.000 | 0.000 | 0.000 | 0.000 | 0.000 | 0.000 | 0.000 | 0.000 | 0.000 | 0.456 | 0.065 |
| 3,3,5-Trimethyl-Cyclohexanone                    | 873-94-9   | 28.56 | 0.001 | 0.000 | 0.074 | 0.003 | 0.079 | 0.008 | 0.001 | 0.000 | 0.001 | 0.000 | 0.079 | 0.007 |
| cyclopentane-1,2-dione                           | 3008-40-0  | 28.81 | 0.000 | 0.000 | 0.001 | 0.000 | 0.001 | 0.000 | 0.013 | 0.006 | 0.027 | 0.010 | 0.084 | 0.024 |
| 3-Methylacetophenone                             | 585-74-0   | 28.96 | 0.014 | 0.001 | 0.058 | 0.006 | 0.028 | 0.008 | 0.250 | 0.206 | 0.026 | 0.001 | 0.643 | 0.036 |
| 2,2,6-Trimethyl-1,4-cyclohexanedione             | 20547-99-3 | 29.00 | 0.005 | 0.002 | 0.012 | 0.003 | 0.033 | 0.008 | 0.396 | 0.060 | 0.026 | 0.022 | 0.133 | 0.032 |
| Tetrahydro-6-methyl-2h-pyran-2-one               | 823-22-3   | 29.17 | 0.001 | 0.000 | 0.038 | 0.006 | 0.117 | 0.028 | 0.016 | 0.001 | 0.001 | 0.000 | 0.646 | 0.096 |
| $\beta$ -Damascenone                             | 23696-85-7 | 29.93 | 0.106 | 0.026 | 0.558 | 0.083 | 0.108 | 0.018 | 2.487 | 0.238 | 0.482 | 0.095 | 0.644 | 0.118 |
| (+)-Isopiperitenone                              | 16750-82-6 | 30.13 | 0.047 | 0.010 | 0.036 | 0.004 | 0.019 | 0.005 | 0.037 | 0.014 | 0.019 | 0.002 | 0.060 | 0.008 |
| 5-Methyl-5H-furan-2-one                          | 591-11-7   | 30.93 | 0.000 | 0.000 | 0.000 | 0.000 | 0.040 | 0.012 | 0.093 | 0.024 | 0.065 | 0.023 | 0.001 | 0.000 |
| 2-Hydroxy-3,5,5-trimethyl-2-cyclohexen-1,4-dione | 35692-98-9 | 32.76 | 0.001 | 0.000 | 0.001 | 0.000 | 0.019 | 0.009 | 0.032 | 0.002 | 0.010 | 0.003 | 0.000 | 0.000 |
| 1-Carvone                                        | 99-49-0    | 34.62 | 0.000 | 0.000 | 0.000 | 0.000 | 0.000 | 0.000 | 0.000 | 0.000 | 0.000 | 0.000 | 1.441 | 0.192 |
| Hydroxydihydromaltol                             | 28564-83-2 | 35.25 | 0.000 | 0.000 | 0.000 | 0.000 | 0.000 | 0.000 | 0.000 | 0.000 | 0.000 | 0.000 | 0.307 | 0.095 |
| 8-Hydroxycarvotanacetone                         | 7712-46-1  | 36.15 | 0.001 | 0.000 | 0.000 | 0.000 | 0.038 | 0.016 | 0.092 | 0.012 | 0.052 | 0.034 | 0.127 | 0.056 |
| 4'-Isopropylacetophenone                         | 645-13-6   | 38.66 | 0.000 | 0.000 | 0.000 | 0.000 | 0.001 | 0.000 | 0.247 | 0.051 | 0.024 | 0.007 | 0.158 | 0.126 |
| <i>Nitrogenates</i>                              |            |       |       |       |       |       |       |       |       |       |       |       |       |       |
| N-Methylpropylamine                              | 627-35-0   | 4.35  | 0.000 | 0.000 | 0.001 | 0.000 | 0.000 | 0.000 | 0.000 | 0.000 | 0.038 | 0.006 | 0.000 | 0.000 |
| 2,5-Dimethyl-pyrazine                            | 123-32-0   | 18.79 | 0.000 | 0.000 | 0.002 | 0.004 | 0.000 | 0.000 | 0.564 | 0.057 | 0.024 | 0.003 | 0.037 | 0.008 |
| 2-Methyl-propanamide                             | 563-83-7   | 29.39 | 0.000 | 0.000 | 0.007 | 0.003 | 0.000 | 0.000 | 0.366 | 0.095 | 0.001 | 0.000 | 0.021 | 0.006 |
| Butyramide                                       | 541-35-5   | 31.06 | 0.000 | 0.000 | 0.000 | 0.000 | 0.000 | 0.000 | 0.051 | 0.010 | 0.000 | 0.000 | 0.001 | 0.000 |
| Isovaleramide                                    | 541-46-8   | 31.39 | 0.000 | 0.000 | 0.000 | 0.000 | 0.001 | 0.000 | 0.561 | 0.078 | 0.038 | 0.007 | 0.000 | 0.000 |
| Phenylacetone nitrile                            | 140-29-4   | 31.58 | 0.030 | 0.017 | 0.122 | 0.017 | 0.114 | 0.032 | 0.049 | 0.001 | 0.051 | 0.011 | 3.112 | 0.345 |
| 2-Pyrrolidone                                    | 616-45-5   | 32.71 | 0.001 | 0.000 | 0.000 | 0.000 | 0.000 | 0.000 | 0.001 | 0.000 | 0.000 | 0.000 | 0.086 | 0.047 |
| 2'-Aminoacetophenone                             | 551-93-9   | 34.65 | 0.000 | 0.000 | 0.001 | 0.000 | 0.000 | 0.000 | 0.001 | 0.000 | 0.146 | 0.023 | 2.567 | 0.342 |
| n-(2-Acetylphenyl)formamide                      | 5257 06 7  | 40.58 | 0.000 | 0.000 | 0.000 | 0.000 | 0.000 | 0.000 | 0.000 | 0.000 | 0.000 | 0.000 | 0.750 | 0.217 |
| <i>Sulfurated</i>                                |            |       |       |       |       |       |       |       |       |       |       |       |       |       |
| Dimethyl sulfide                                 | 75-18-3    | 1.90  | 0.708 | 0.062 | 0.484 | 0.029 | 0.674 | 0.091 | 1.823 | 0.091 | 0.793 | 0.152 | 3.607 | 0.173 |
| Dimethyl sulfoxide                               | 67-68-5    | 24.57 | 0.008 | 0.006 | 0.021 | 0.000 | 0.019 | 0.005 | 0.001 | 0.000 | 0.001 | 0.000 | 0.061 | 0.033 |
| Dimethylsulfone                                  | 67-71-0    | 31.09 | 0.050 | 0.005 | 0.024 | 0.001 | 0.049 | 0.013 | 0.304 | 0.064 | 0.065 | 0.023 | 0.237 | 0.040 |
| <i>Terpenes</i>                                  |            |       |       |       |       |       |       |       |       |       |       |       |       |       |
| $\beta$ -Pinene                                  | 127-91-3   | 9.61  | 0.000 | 0.000 | 0.000 | 0.000 | 0.040 | 0.001 | 0.079 | 0.023 | 0.068 | 0.013 | 0.084 | 0.027 |
| Sabinene                                         | 3387-41-5  | 10.49 | 0.001 | 0.000 | 0.000 | 0.000 | 0.080 | 0.013 | 0.207 | 0.004 | 0.189 | 0.015 | 0.183 | 0.024 |

|                                 |            |       |       |       |       |       |       |       |        |       |       |       |        |       |
|---------------------------------|------------|-------|-------|-------|-------|-------|-------|-------|--------|-------|-------|-------|--------|-------|
| $\alpha$ -Phellandrene          | 99-83-2    | 12.77 | 0.001 | 0.000 | 0.001 | 0.000 | 0.001 | 0.000 | 0.001  | 0.000 | 0.001 | 0.000 | 0.033  | 0.008 |
| $\beta$ -Myrcene                | 123-35-3   | 13.24 | 0.008 | 0.002 | 0.003 | 0.005 | 0.001 | 0.000 | 0.039  | 0.008 | 0.040 | 0.013 | 0.040  | 0.004 |
| $\alpha$ -Terpinene             | 99-86-5    | 13.49 | 0.031 | 0.013 | 0.009 | 0.006 | 0.016 | 0.003 | 0.061  | 0.014 | 0.028 | 0.007 | 0.260  | 0.023 |
| Limonene                        | 138-86-3   | 14.37 | 0.190 | 0.053 | 0.333 | 0.122 | 0.051 | 0.009 | 0.232  | 0.004 | 0.193 | 0.214 | 0.135  | 0.027 |
| 1, 8-Cineol                     | 470-82-6   | 14.72 | 0.172 | 0.063 | 0.105 | 0.024 | 0.045 | 0.007 | 0.161  | 0.019 | 0.081 | 0.006 | 0.203  | 0.027 |
| Herboxide                       | 13679-86-2 | 15.18 | 0.057 | 0.023 | 0.000 | 0.000 | 0.128 | 0.016 | 0.000  | 0.000 | 0.064 | 0.009 | 0.000  | 0.000 |
| <i>trans</i> -3(10)-carene-2-ol | 6909-15-5  | 15.35 | 0.046 | 0.014 | 0.002 | 0.003 | 0.049 | 0.009 | 0.493  | 0.045 | 0.152 | 0.016 | 5.417  | 0.118 |
| $\gamma$ -Terpinene             | 99-85-4    | 16.37 | 0.026 | 0.012 | 0.005 | 0.003 | 0.077 | 0.011 | 0.284  | 0.037 | 0.087 | 0.009 | 0.687  | 0.081 |
| Herboxide isomer                |            | 16.42 | 0.171 | 0.077 | 0.086 | 0.003 | 0.163 | 0.023 | 0.474  | 0.069 | 0.091 | 0.009 | 0.000  | 0.000 |
| E- $\beta$ -Ocimene             | 3779-61-1  | 16.85 | 0.001 | 0.000 | 0.001 | 0.000 | 0.001 | 0.000 | 0.034  | 0.005 | 0.001 | 0.000 | 0.001  | 0.000 |
| m-Cymene                        | 535-77-3   | 17.22 | 0.190 | 0.095 | 0.181 | 0.016 | 0.186 | 0.028 | 0.423  | 0.037 | 0.166 | 0.028 | 0.799  | 0.100 |
| Terpinolene                     | 586-62-9   | 17.67 | 0.001 | 0.000 | 0.001 | 0.000 | 0.137 | 0.016 | 0.478  | 0.033 | 0.186 | 0.109 | 0.087  | 0.007 |
| p-Mentha-1,3,8-triene           | 21195-59-5 | 20.86 | 0.001 | 0.001 | 0.001 | 0.000 | 0.056 | 0.028 | 0.000  | 0.000 | 0.028 | 0.009 | 0.067  | 0.018 |
| Cymene                          | 1195-32-0  | 21.97 | 0.053 | 0.025 | 0.069 | 0.008 | 0.183 | 0.034 | 0.273  | 0.019 | 0.162 | 0.030 | 11.533 | 0.797 |
| Carvyl acetate                  | 97-42-7    | 22.04 | 0.132 | 0.046 | 0.153 | 0.014 | 0.281 | 0.042 | 0.175  | 0.010 | 0.076 | 0.034 | 0.127  | 0.020 |
| <i>cis</i> -Linalool oxide      | 5989-33-3  | 22.22 | 1.398 | 0.286 | 1.330 | 0.162 | 1.372 | 0.131 | 4.031  | 0.124 | 0.000 | 0.000 | 1.731  | 0.161 |
| <i>trans</i> -Linalool oxide    | 34995-77-2 | 22.85 | 1.221 | 0.394 | 1.467 | 0.141 | 1.770 | 0.222 | 3.589  | 0.028 | 1.072 | 0.042 | 1.769  | 0.127 |
| Dihydromyrcenol                 | 53219-21-9 | 22.96 | 0.008 | 0.000 | 0.000 | 0.000 | 0.019 | 0.005 | 0.077  | 0.025 | 0.014 | 0.001 | 0.001  | 0.000 |
| Linalool                        | 78-70-6    | 24.68 | 2.180 | 0.405 | 4.134 | 0.302 | 1.061 | 0.078 | 19.977 | 1.606 | 4.835 | 0.351 | 11.140 | 0.707 |
| (-)- <i>trans</i> -Pinocarvone  | 19890-00-7 | 24.85 | 4.689 | 0.662 | 4.161 | 0.291 | 1.505 | 0.231 | 4.274  | 0.354 | 2.526 | 0.211 | 2.339  | 0.290 |
| 4-Terpineol                     | 562-74-3   | 25.71 | 1.045 | 0.192 | 0.887 | 0.099 | 0.335 | 0.046 | 2.280  | 0.417 | 0.348 | 0.037 | 2.785  | 0.283 |
| 1,8-Menthadien-4-ol             | 3419-02-1  | 27.44 | 0.719 | 0.021 | 1.127 | 0.117 | 1.652 | 0.293 | 1.161  | 0.092 | 0.501 | 0.436 | 0.451  | 0.110 |
| $\alpha$ -Terpineol             | 10482-56-1 | 27.62 | 0.371 | 0.353 | 0.764 | 0.059 | 0.653 | 0.093 | 3.802  | 0.324 | 1.057 | 0.061 | 2.221  | 0.239 |
| Valencene                       | 4630 03 7  | 28.02 | 0.000 | 0.000 | 0.000 | 0.000 | 0.000 | 0.000 | 0.523  | 0.199 | 0.039 | 0.006 | 0.000  | 0.000 |
| p-Mentha-1,5-dien-8-ol          | 1686-20-0  | 28.17 | 0.214 | 0.026 | 0.155 | 0.031 | 0.238 | 0.087 | 0.723  | 0.062 | 0.226 | 0.039 | 0.235  | 0.046 |
| (+)- $\delta$ -Cadinene         | 483-76-1   | 28.86 | 0.043 | 0.005 | 0.052 | 0.002 | 0.022 | 0.012 | 0.197  | 0.056 | 0.020 | 0.008 | 0.048  | 0.005 |
| p-Mentha-1,5-dien-8-ol isomer   | 1686-20-0  | 29.20 | 0.186 | 0.031 | 0.213 | 0.038 | 0.604 | 0.146 | 0.083  | 0.023 | 0.021 | 0.008 | 0.465  | 0.115 |
| <i>trans</i> -3-carene-2-ol     | 6909-16-6  | 29.68 | 0.103 | 0.017 | 0.141 | 0.031 | 0.174 | 0.026 | 0.104  | 0.020 | 0.086 | 0.012 | 0.202  | 0.033 |
| Calamenene                      | 483-77-2   |       | 0.001 | 0.000 | 0.000 | 0.000 | 0.001 | 0.000 | 0.032  | 0.018 | 0.001 | 0.000 | 0.026  | 0.002 |
| p-Cymen-7-ol                    | 536-60-7   | 30.42 | 0.136 | 0.032 | 0.206 | 0.030 | 1.861 | 0.446 | 0.868  | 0.034 | 1.295 | 0.180 | 3.665  | 0.582 |
| $\alpha$ -Calacorene            | 21391-99-1 | 31.56 | 0.071 | 0.058 | 0.050 | 0.007 | 0.039 | 0.011 | 0.085  | 0.012 | 0.030 | 0.008 | 0.035  | 0.006 |
| Eugenol                         | 97-53-0    | 34.12 | 0.000 | 0.000 | 0.053 | 0.006 | 0.000 | 0.000 | 0.210  | 0.049 | 0.028 | 0.011 | 0.001  | 0.000 |
| 10-epi- $\gamma$ -eudesmol      | 1209-71-8  | 34.20 | 0.000 | 0.000 | 0.001 | 0.000 | 0.104 | 0.035 | 0.001  | 0.000 | 0.070 | 0.024 | 0.000  | 0.000 |
| Guaiazulene                     | 489-84-9   | 34.82 | 0.001 | 0.000 | 0.028 | 0.004 | 0.074 | 0.025 | 0.001  | 0.000 | 0.060 | 0.014 | 0.001  | 0.000 |
| (+)- $\beta$ -Eudesmol          | 473-15-4   | 34.92 | 0.000 | 0.000 | 0.000 | 0.000 | 0.064 | 0.030 | 0.001  | 0.000 | 0.111 | 0.056 | 0.001  | 0.000 |
| <i>cis</i> -Isoeugenol          | 5932-68-3  | 36.42 | 0.000 | 0.000 | 0.000 | 0.000 | 0.000 | 0.000 | 0.053  | 0.008 | 0.001 | 0.000 | 0.001  | 0.000 |
| <i>Other</i>                    |            |       |       |       |       |       |       |       |        |       |       |       |        |       |
| 1-Chloro-octane                 | 111-85-3   | 16.65 | 0.033 | 0.017 | 0.020 | 0.002 | 0.013 | 0.003 | 0.022  | 0.005 | 0.021 | 0.012 | 0.000  | 0.000 |
| Cyclooctene oxide               | 286-62-4   | 21.78 | 0.001 | 0.000 | 0.053 | 0.006 | 0.053 | 0.007 | 0.001  | 0.000 | 0.001 | 0.000 | 0.323  | 0.031 |

Table S4. Results regarding metabolomic identification of phenolic compounds (Rt, retention time).

| RT [min]          | Name                               | Formula                                        | exact mass |
|-------------------|------------------------------------|------------------------------------------------|------------|
| <b>Flavanone</b>  |                                    |                                                |            |
| 17,6              | 4'-Hydroxyflavanone                | C <sub>15</sub> H <sub>12</sub> O <sub>3</sub> | 274,1777   |
| 19,3              | Flavanone                          | C <sub>15</sub> H <sub>12</sub> O <sub>2</sub> | 225,0910   |
| 19,5              | Naringenin                         | C <sub>15</sub> H <sub>12</sub> O <sub>5</sub> | 272,0682   |
| 23,6              | Isosakuranetin                     | C <sub>16</sub> H <sub>14</sub> O <sub>5</sub> | 287,0914   |
| 28,7              | Sakuranetin                        | C <sub>16</sub> H <sub>14</sub> O <sub>5</sub> | 287,0914   |
| <b>Flavone</b>    |                                    |                                                |            |
| 20,2              | Hispidulin                         | C <sub>16</sub> H <sub>12</sub> O <sub>6</sub> | 300,0630   |
| 20,4              | 6,7-Dihydroxyflavone               | C <sub>15</sub> H <sub>10</sub> O <sub>4</sub> | 254,0579   |
| 20,7              | 5,7,8-Trihydroxyflavone            | C <sub>15</sub> H <sub>10</sub> O <sub>5</sub> | 270,0522   |
| 21,3              | Luteolin                           | C <sub>15</sub> H <sub>10</sub> O <sub>6</sub> | 286,0477   |
| 21,9              | 5-Hydroxy-4',6,7-trimethoxyflavone | C <sub>18</sub> H <sub>16</sub> O <sub>6</sub> | 328,0943   |
| 22,4              | Hispidulin                         | C <sub>16</sub> H <sub>12</sub> O <sub>6</sub> | 300,0630   |
| 22,4              | 7,8-Dihydroxyflavone               | C <sub>15</sub> H <sub>10</sub> O <sub>4</sub> | 254,0579   |
| 22,6              | 3',4'-Dihydroxyflavone             | C <sub>15</sub> H <sub>10</sub> O <sub>4</sub> | 254,0579   |
| 22,6              | Tricin                             | C <sub>17</sub> H <sub>14</sub> O <sub>7</sub> | 330,0736   |
| 23,5              | Pectolinarigenin                   | C <sub>17</sub> H <sub>14</sub> O <sub>6</sub> | 314,0787   |
| 26,2              | 5,6,7-Trihydroxyflavone            | C <sub>15</sub> H <sub>10</sub> O <sub>5</sub> | 270,0522   |
| 26,5              | Tetramethylscutellarein            | C <sub>19</sub> H <sub>18</sub> O <sub>6</sub> | 342,1099   |
| <b>Flavonol</b>   |                                    |                                                |            |
| 11,0              | 5-Deoxykaempferol                  | C <sub>15</sub> H <sub>10</sub> O <sub>5</sub> | 270,0520   |
| 18,3              | Fisetin                            | C <sub>15</sub> H <sub>10</sub> O <sub>6</sub> | 286,0470   |
| 19,3              | Galangin                           | C <sub>15</sub> H <sub>10</sub> O <sub>5</sub> | 270,0520   |
| 19,7              | Quercetin                          | C <sub>15</sub> H <sub>10</sub> O <sub>7</sub> | 302,0422   |
| 20,5              | Kaempferol                         | C <sub>15</sub> H <sub>10</sub> O <sub>6</sub> | 286,0473   |
| 20,6              | 3-Methylquercetin                  | C <sub>16</sub> H <sub>12</sub> O <sub>7</sub> | 316,0580   |
| 24,9              | Robinetin                          | C <sub>15</sub> H <sub>10</sub> O <sub>7</sub> | 302,0421   |
| 25,1              | Kaempferol 3,7,4'-trimethyl ether  | C <sub>18</sub> H <sub>16</sub> O <sub>6</sub> | 328,0943   |
| <b>Isoflavone</b> |                                    |                                                |            |
| 17,3              | Daidzein                           | C <sub>15</sub> H <sub>10</sub> O <sub>4</sub> | 254,0579   |
| 18,8              | Vestitone                          | C <sub>16</sub> H <sub>14</sub> O <sub>5</sub> | 286,0838   |
| 19,3              | 3'-Hydroxybiochanin A              | C <sub>16</sub> H <sub>12</sub> O <sub>6</sub> | 300,0634   |
| 20,0              | Biochanin A                        | C <sub>16</sub> H <sub>12</sub> O <sub>5</sub> | 284,0685   |
| 21,0              | 2'-Hydroxyformononetin             | C <sub>16</sub> H <sub>12</sub> O <sub>5</sub> | 284,0685   |
| 22,3              | Formononetin                       | C <sub>16</sub> H <sub>12</sub> O <sub>4</sub> | 268,0735   |
| 23,0              | 3'-Hydroxyprunetin                 | C <sub>16</sub> H <sub>12</sub> O <sub>6</sub> | 300,0634   |
| 23,5              | Pisatin                            | C <sub>17</sub> H <sub>14</sub> O <sub>6</sub> | 314,0787   |
| 24,2              | Glycitein                          | C <sub>16</sub> H <sub>12</sub> O <sub>5</sub> | 284,0681   |
| 24,3              | Prunetin                           | C <sub>16</sub> H <sub>12</sub> O <sub>5</sub> | 284,0685   |
| 25,0              | Genistein                          | C <sub>17</sub> H <sub>10</sub> O <sub>5</sub> | 270,0526   |
| 25,3              | 4',7-Dimethoxyisoflavone           | C <sub>17</sub> H <sub>14</sub> O <sub>4</sub> | 282,0892   |

|                                    |                                                             |                                                               |          |
|------------------------------------|-------------------------------------------------------------|---------------------------------------------------------------|----------|
| <b>26,4</b>                        | Luteone                                                     | C <sub>20</sub> H <sub>18</sub> O <sub>6</sub>                | 354,1099 |
| <b>Phenolic acid and derivates</b> |                                                             |                                                               |          |
| <b>3,7</b>                         | protocatechuic acid                                         | C <sub>7</sub> H <sub>6</sub> O <sub>4</sub>                  | 154,0263 |
| <b>10,2</b>                        | Dihydro-p-coumaric acid                                     | C <sub>9</sub> H <sub>10</sub> O <sub>3</sub>                 | 166,0627 |
| <b>11,0</b>                        | dihydroconiferyl alcohol glucoside                          | C <sub>16</sub> H <sub>24</sub> O <sub>8</sub>                | 344,1468 |
| <b>12,9</b>                        | dihydroconiferyl alcohol glucoside                          | C <sub>16</sub> H <sub>24</sub> O <sub>8</sub>                | 344,1466 |
| <b>12,7</b>                        | 3,4,5-Trimethoxycinnamic acid                               | C <sub>12</sub> H <sub>14</sub> O <sub>5</sub>                | 238,0838 |
| <b>13,0</b>                        | p-coumaric acid                                             | C <sub>9</sub> H <sub>8</sub> O <sub>3</sub>                  | 164,0471 |
| <b>13,5</b>                        | Cinnamic acid                                               | C <sub>9</sub> H <sub>8</sub> O <sub>2</sub>                  | 148,0522 |
| <b>13,8</b>                        | Ferulic acid                                                | C <sub>10</sub> H <sub>10</sub> O <sub>4</sub>                | 194,0575 |
| <b>14,4</b>                        | 4-Methoxycinnamic acid                                      | C <sub>10</sub> H <sub>10</sub> O <sub>3</sub>                | 178,0627 |
| <b>15,5</b>                        | Salicylic acid                                              | C <sub>7</sub> H <sub>6</sub> O <sub>3</sub>                  | 138,0314 |
| <b>19,8</b>                        | tricoumaroyl spermidine                                     | C <sub>34</sub> H <sub>37</sub> N <sub>3</sub> O <sub>6</sub> | 583,2678 |
| <b>27,8</b>                        | Coniferyl ferulate                                          | C <sub>20</sub> H <sub>20</sub> O <sub>6</sub>                | 356,1257 |
| <b>Quinoline</b>                   |                                                             |                                                               |          |
| <b>5,9</b>                         | 8-Hydroxyquinoline                                          | C <sub>9</sub> H <sub>7</sub> NO                              | 145,0525 |
| <b>7,9</b>                         | 2-Hydroxyquinoline                                          | C <sub>9</sub> H <sub>7</sub> NO                              | 145,0525 |
| <b>9,4</b>                         | 2-Quinolinecarboxylic acid                                  | C <sub>10</sub> H <sub>7</sub> NO <sub>2</sub>                | 173,0474 |
| <b>14,1</b>                        | 6-Hydroxyquinoline                                          | C <sub>9</sub> H <sub>7</sub> NO                              | 145,0525 |
| <b>Tryptophan metabolite</b>       |                                                             |                                                               |          |
| <b>7,9</b>                         | 3-hydroxyquinaldic acid                                     | C <sub>10</sub> H <sub>7</sub> NO <sub>3</sub>                | 189,0423 |
| <b>10,7</b>                        | 5-Hydroxyindole-3-acetic acid                               | C <sub>10</sub> H <sub>9</sub> NO <sub>2</sub>                | 191,0579 |
| <b>13,6</b>                        | 4-Aminobenzoic acid                                         | C <sub>7</sub> H <sub>7</sub> NO <sub>2</sub>                 | 137,0474 |
| <b>14,1</b>                        | Kynurenic acid                                              | C <sub>10</sub> H <sub>7</sub> NO <sub>3</sub>                | 189,0423 |
| <b>Coumarine</b>                   |                                                             |                                                               |          |
| <b>18,8</b>                        | Oxypeucedanin                                               | C <sub>16</sub> H <sub>14</sub> O <sub>5</sub>                | 286,0838 |
| <b>25,3</b>                        | 4-Ethyl-7-hydroxy-3-(p-methoxyphenyl)coumarin               | C <sub>18</sub> H <sub>16</sub> O <sub>4</sub>                | 296,1044 |
| <b>Catechol metabolite</b>         |                                                             |                                                               |          |
| <b>2,4</b>                         | Guaiacol                                                    | C <sub>7</sub> H <sub>8</sub> O <sub>2</sub>                  | 124,0523 |
| <b>Dopamine metabolite</b>         |                                                             |                                                               |          |
| <b>2,4</b>                         | 3,4-dihydroxyphenylacetic acid                              | C <sub>8</sub> H <sub>8</sub> O <sub>4</sub>                  | 168,0421 |
| <b>Carotenoid sesquiterpenoid</b>  |                                                             |                                                               |          |
| <b>13,4</b>                        | Phaseic acid                                                | C <sub>15</sub> H <sub>20</sub> O <sub>5</sub>                | 280,1306 |
| <b>Sesquiterpene</b>               |                                                             |                                                               |          |
| <b>11,0</b>                        | Artemisinin                                                 | C <sub>15</sub> H <sub>22</sub> O <sub>5</sub>                | 282,1463 |
| <b>Glucuronated terpenoide</b>     |                                                             |                                                               |          |
| <b>17,4</b>                        | 2-Hydroxy-2-(4-methyl-2-oxocyclohexyl)propyl hexopyranoside | C <sub>16</sub> H <sub>28</sub> O <sub>8</sub>                | 348,1780 |
| <b>18,8</b>                        | Dihydroxyfenchone 6 - O - D-glucoside                       | C <sub>16</sub> H <sub>26</sub> O <sub>8</sub>                | 346,1624 |
| <b>Fatty acid and derivatives</b>  |                                                             |                                                               |          |
| <b>18,8</b>                        | 4-Hydroxynonenal                                            | C <sub>9</sub> H <sub>16</sub> O <sub>2</sub>                 | 156,1148 |
| <b>19,6</b>                        | Dodecanedioic acid                                          | C <sub>12</sub> H <sub>22</sub> O <sub>4</sub>                | 230,1514 |
| <b>22,6</b>                        | 9,12,13-Trihydroxy-10,15-octadecadienoic acid               | C <sub>18</sub> H <sub>32</sub> O <sub>5</sub>                | 328,2246 |
| <b>23,0</b>                        | Traumatic Acid                                              | C <sub>12</sub> H <sub>20</sub> O <sub>4</sub>                | 228,1358 |
| <b>23,3</b>                        | 3-Hydroxytetradecanedioic acid                              | C <sub>14</sub> H <sub>26</sub> O <sub>5</sub>                | 274,1777 |
| <b>23,5</b>                        | pinellic acid                                               | C <sub>18</sub> H <sub>34</sub> O <sub>5</sub>                | 330,2403 |
| <b>24,0</b>                        | 12-Hydroxylauric acid                                       | C <sub>12</sub> H <sub>24</sub> O <sub>3</sub>                | 216,1720 |

|                                 |                                  |                      |          |
|---------------------------------|----------------------------------|----------------------|----------|
| <b>26,2</b>                     | 8-Hydroxyhexadecanedioic acid    | $C_{16}H_{30}O_5$    | 302,2088 |
| <b>26,7</b>                     | 10,16-Dihydroxyhexadecanoic acid | $C_{16}H_{32}O_4$    | 288,2297 |
| <b>28,7</b>                     | 9,10-Dihydroxystearic acid       | $C_{18}H_{36}O_4$    | 316,2609 |
| <b>29,3</b>                     | Juniperic acid                   | $C_{16}H_{32}O_3$    | 272,2348 |
| <b>32,3</b>                     | Elaidolinolenic acid             | $C_{18}H_{30}O_2$    | 278,2241 |
| <b>34,1</b>                     | Palmitic Acid                    | $C_{16}H_{32}O_2$    | 256,2399 |
| <b>34,3</b>                     | Oleic acid                       | $C_{18}H_{34}O_2$    | 282,2555 |
| <b>linear dicarboxylic acid</b> |                                  |                      |          |
| <b>13,6</b>                     | Suberic acid                     | $C_8H_{14}O_4$       | 174,0888 |
| <b>14,0</b>                     | 3-Hydroxysebacic acid            | $C_{10}H_{18}O_5$    | 218,1150 |
| <b>19,7</b>                     | Sebacic acid                     | $C_{10}H_{18}O_4$    | 202,1203 |
| <b>Antimicrobial Peptide</b>    |                                  |                      |          |
| <b>26,9</b>                     | Heliomycin                       | $C_{22}H_{16}O_6$    | 376,0943 |
| <b>N-acyl-aminoacids</b>        |                                  |                      |          |
| <b>1,3</b>                      | N-Phenylacetylglutamic acid      | $C_{13}H_{15}N_2O_5$ | 265,0947 |
| <b>12,3</b>                     | N-Acetyl-L-phenylalanine         | $C_{11}H_{13}N_2O_3$ | 207,0892 |

Figure S1. Most important metabolites for each honey.

*Compounds dominant in F*

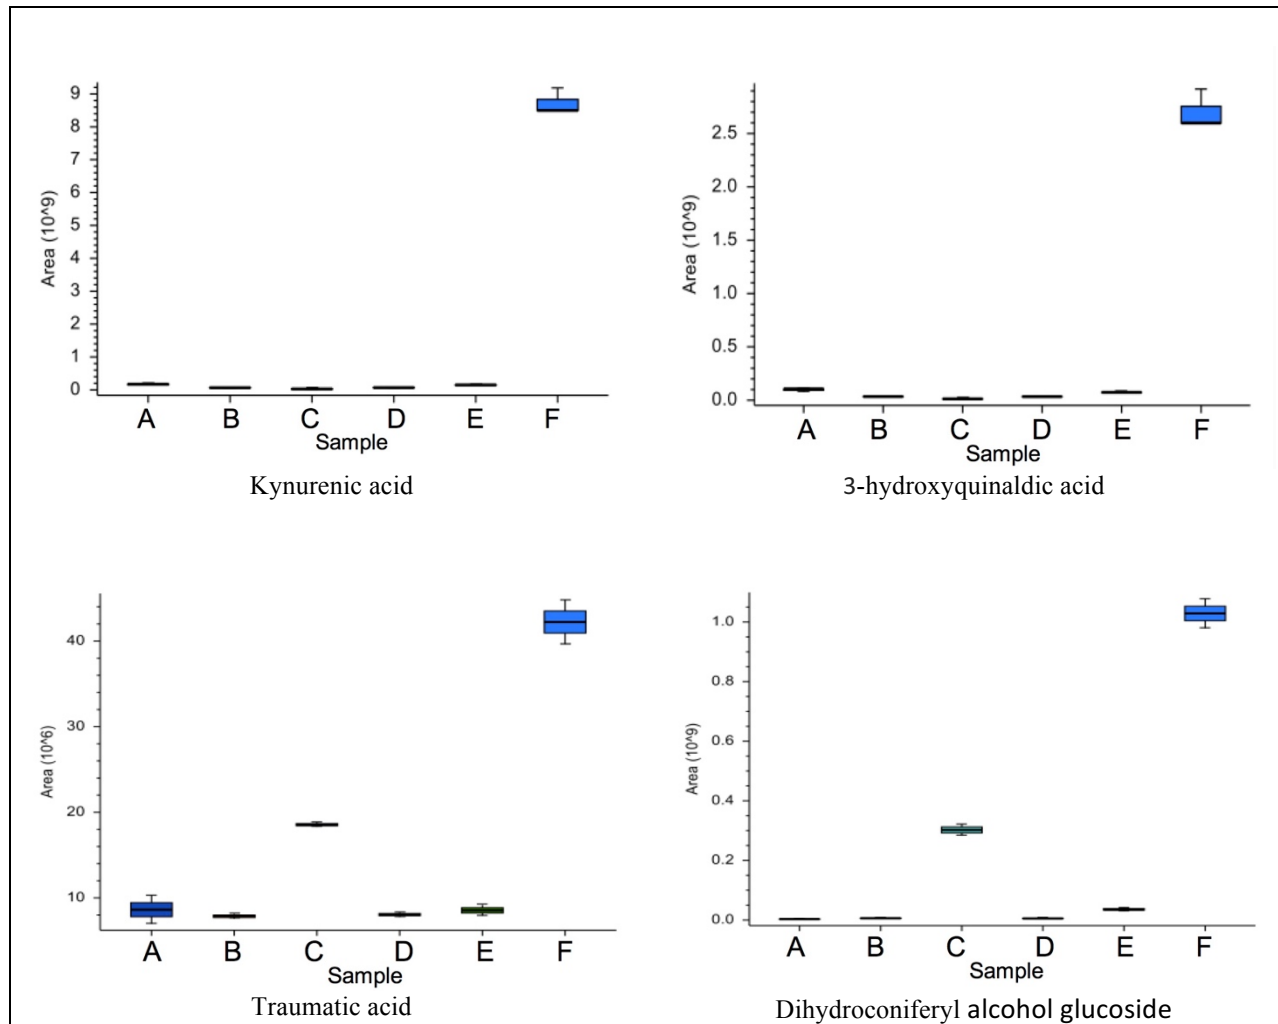

Compounds dominant in C

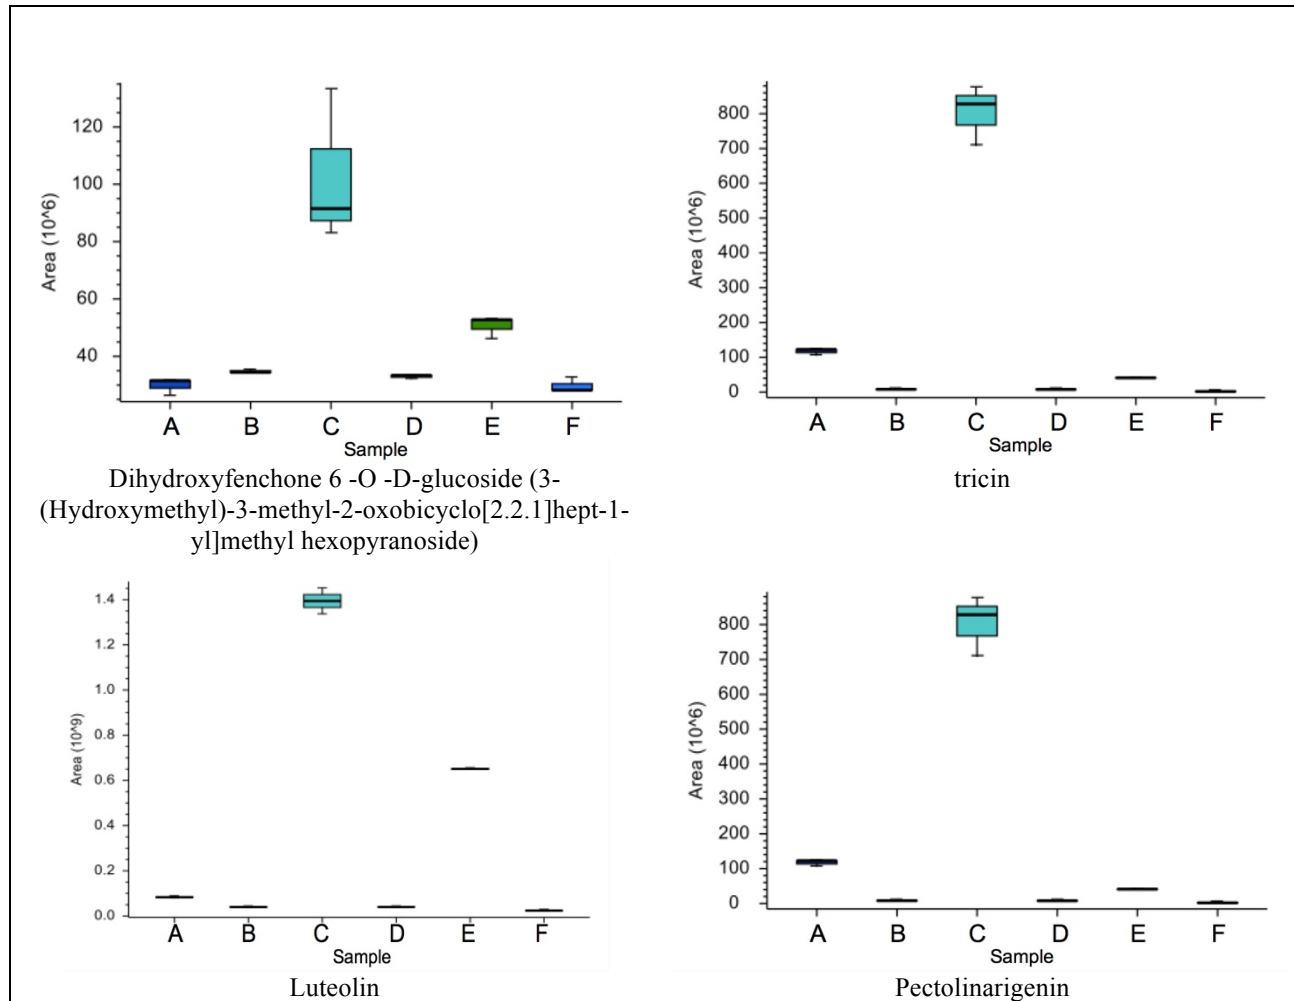



Compounds dominant in C and E

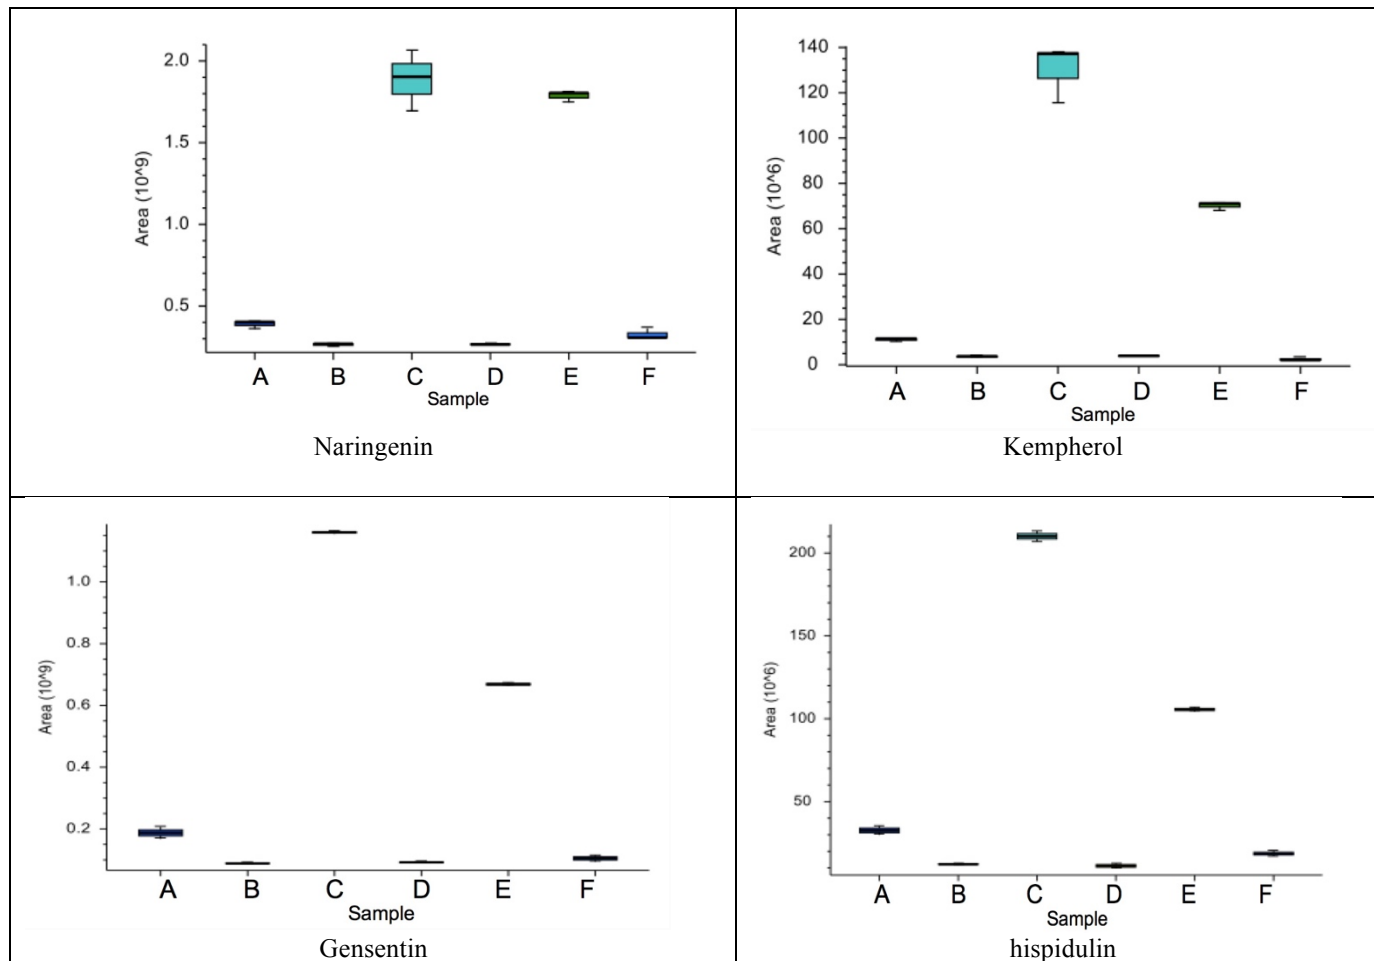

*Compounds dominant in B and D*

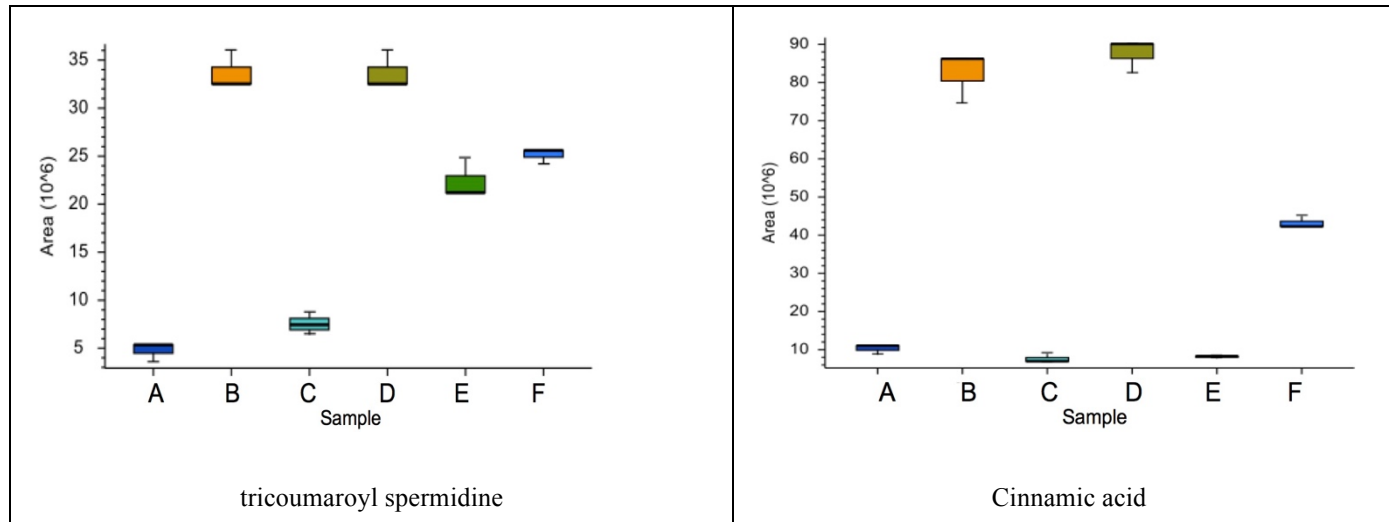

Figure S2. Main metabolic pathway identified in isoflavonoids.

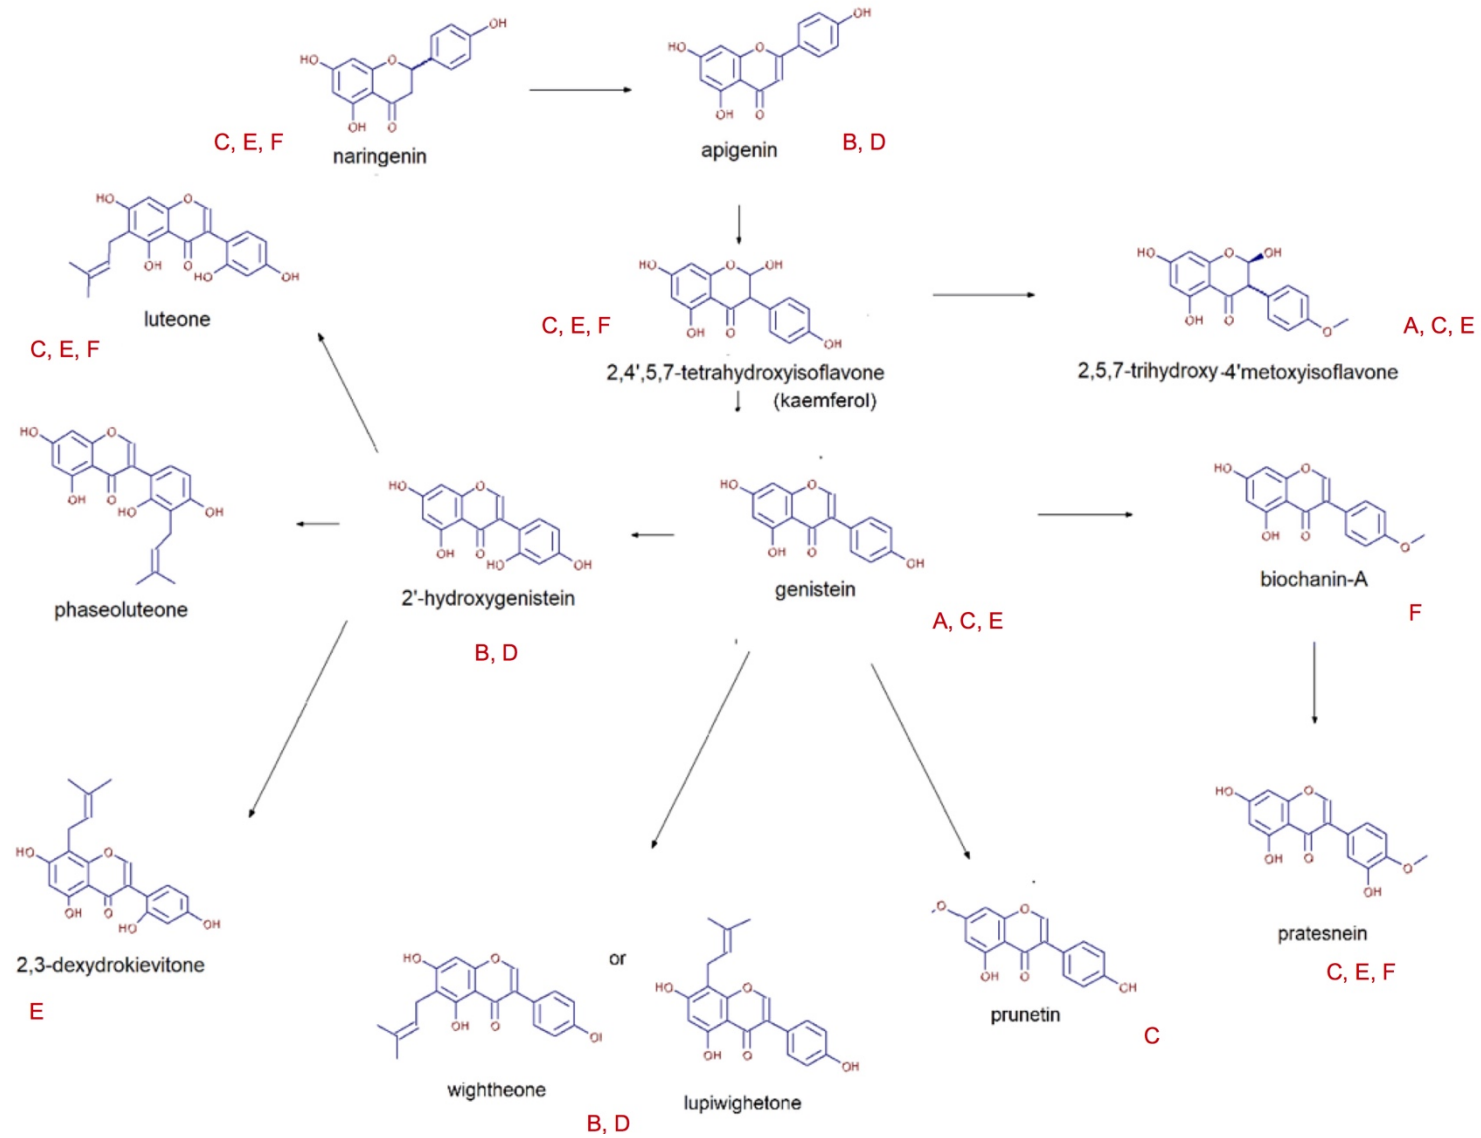

Supplement: 41598_2021_98876_MOESM1_ESM.pdf [file 41598_2021_98876_MOESM1_ESM.pdf]
